# Supplementary material
Source: PubMed Central journal article supplement (PMC4959489)
Supplement: AEM.03409-15_zam999117082so1.pdf [file AEM.03409-15_zam999117082so1.pdf]

## **Supplementary Material**

### **Illuminating Anaerobic Microbial Community and Co-occurrence Patterns across a Quality Gradient in Chinese Liquor Fermentation Pit Muds**

Xiaolong Hu, Hai Du, Cong Ren, Yan Xu\*

State Key Laboratory of Food Science and Technology, Key Laboratory of Industrial  
Biotechnology of Ministry of Education, Synergetic Innovation Center of Food Safety  
and Nutrition, School of Biotechnology, Jiangnan University, 1800 Lihu Avenue,  
Wuxi, Jiangsu 214122, China

#### **Running title**

Microbial community reflects pit-mud quality and stability

## Supplementary method

### Quantification of lactic acid in FPM

For the detection of lactate, the air-dried FPM was vortex mixed with ultrapure water on a 1:3 (w/v) ratio at room temperature and then centrifugated (5 min, 8000 rpm). The supernatant was filtered through 0.22  $\mu\text{m}$  MCE syringe filter, and a 10  $\mu\text{L}$  of this solution was injected onto a high-performance liquid chromatography apparatus (Agilent 1200 system) (Agilent Technologies, Palo Alto, CA, USA) with ultraviolet (UV) detector. The chromatographic separation was carried out on a Xselect™ HSS T3 column with particle size of 5  $\mu\text{m}$  (4.6 $\times$ 250 mm, Waters Corporation, Milford, MS, USA) at 30 °C. The mobile phase consisted of 10 mM of  $\text{NaH}_2\text{PO}_4$  in ultrapure water (pH adjusted to 2.9). The flow rate and UV detector were set at 0.80 ml/min and a wavelength of 210 nm.

### Construction of calibration curve for the quantification of *Clostridia*, *C. kluyveri* and LAB in FPM samples based on real-time quantitative PCR (qPCR)

The plasmid DNA used for the construction of calibration curve for quantifying the *Clostridia* and *C. kluyveri* was constructed based on the 16S rRNA gene from species of *C. kluyveri*, and the plasmid DNA used for the construction of calibration curve for quantifying the lactic acid bacteria (LAB, e.g., *Lactobacillus*, *Pediococcus*, *Leuconostoc* and *Weissella*, see reference 6) was constructed based on the 16S rRNA gene from species of *Lactobacillus homohiochii*. Firstly, the near full length 16S rRNA genes of *C. kluyveri* and *Lactobacillus homohiochii* amplified with primer set 27F/1492R (1), were ligated into pMD19-T vector (TaKaRa), cloned in *E.coli* JM109 and verified as described by Wang et al. (2). Secondly, the 16S rRNA gene copy numbers of above plasmids were calculated using the previous equation (3). Then, ten-fold serial dilutions of the above plasmids containing 16S rRNA genes of *C. kluyveri* or *L. homohiochii*, were amplified according to the PCR reaction system and conditions described in manuscript (section Real-Time quantitative PCR analysis) using corresponding specific primers SJ-F/SJ-R for *Clostridia* (generating an about 270-bp amplicon) (4), CloKly1F/CloKly1R for *C. kluyveri* (~ 185-bp amplicon) (5) and Lac1/ Lac2 for LAB (~ 345-bp amplicon) (6), and the standard curves for the quantification of *Clostridia*, *C. kluyveri* and LAB were respectively generated by plotting the threshold cycle (Ct) values against the Log<sub>10</sub> 16S rRNA gene copy numbers of above dilutions. Three replicates of each dilution were analyzed.

The amplification efficiency and  $R^2$  value of calibration curve for *Clostridia* were 103% and 0.9998, for *C. kluyveri* were 105% and 0.9997, and for LAB were 106% and 0.992, indicating that the qPCR assay for quantifying above microbial taxa were suitable and accurate (7, 8).

## Figures

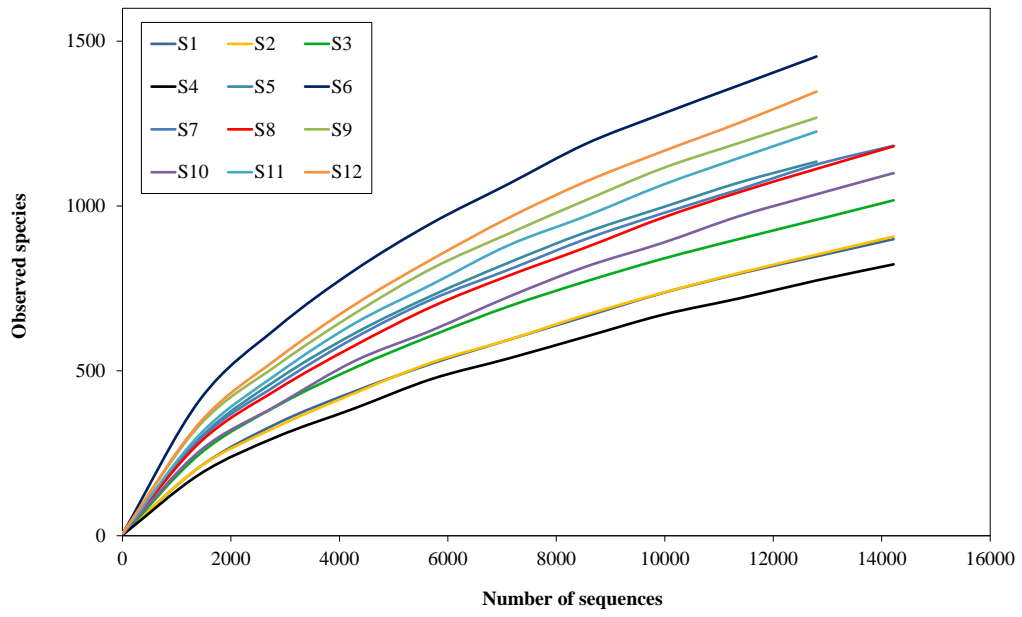

**Fig. S1** Rarefaction curves based on the OTUs at the cutoff of 97% 16S rRNA sequence similarity.

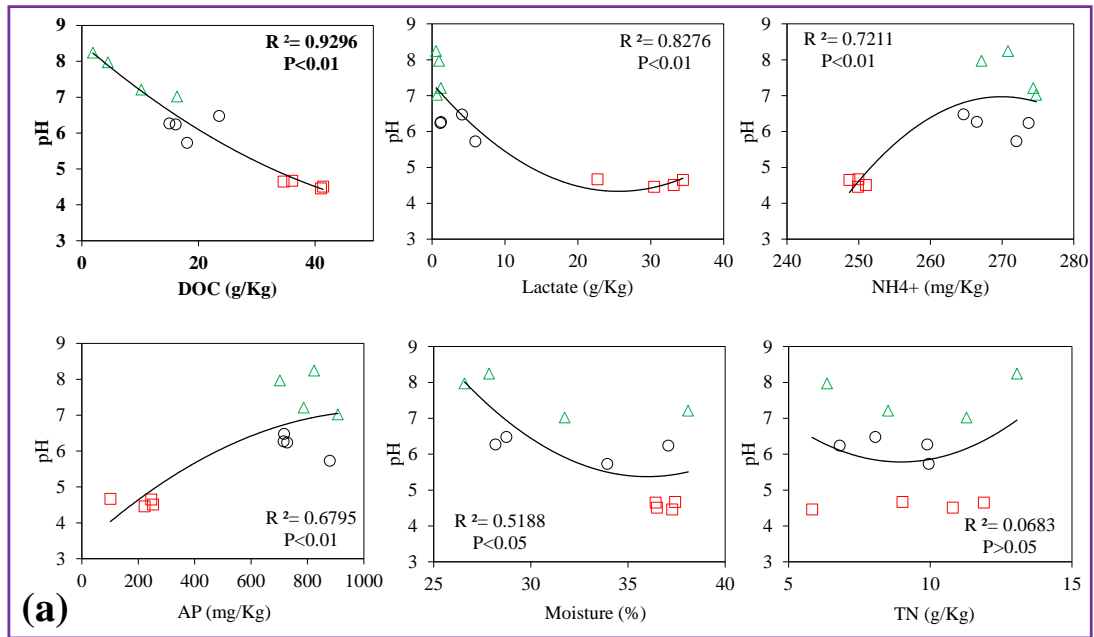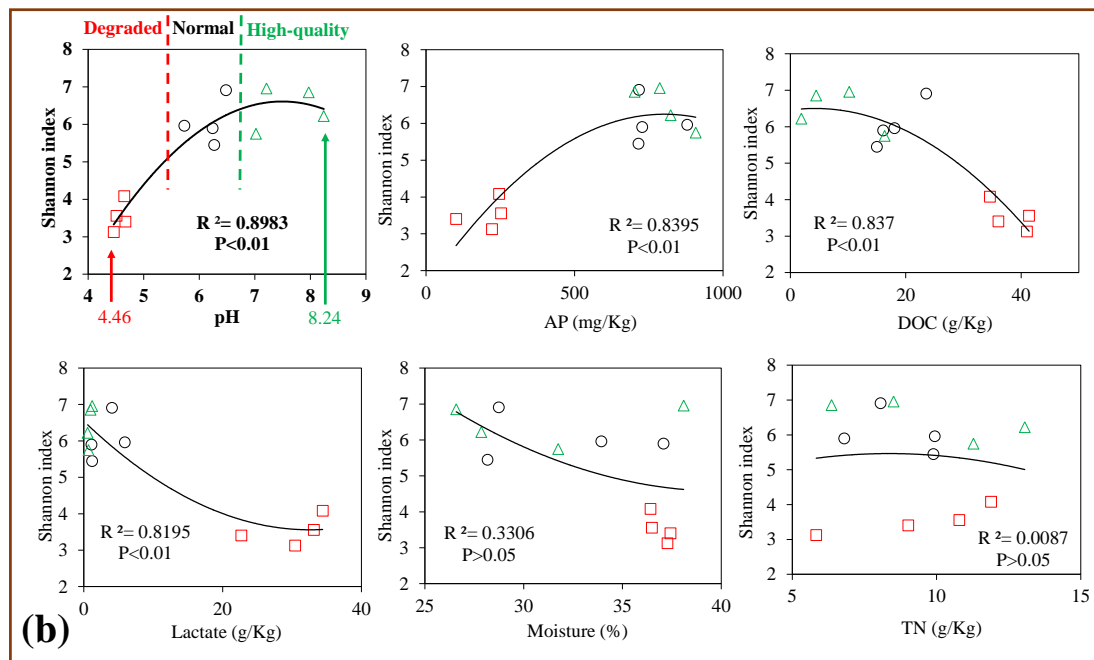

**Fig. S2** Relationships between FPM pH and other biogeochemical attributes (a); Relationships between FPM biogeochemical attributes and FPM microbial community diversity (b). ( $\Delta$ ): High-quality FPMs, ( $\circ$ ): Normal FPMs, ( $\square$ ): Degraded FPMs.

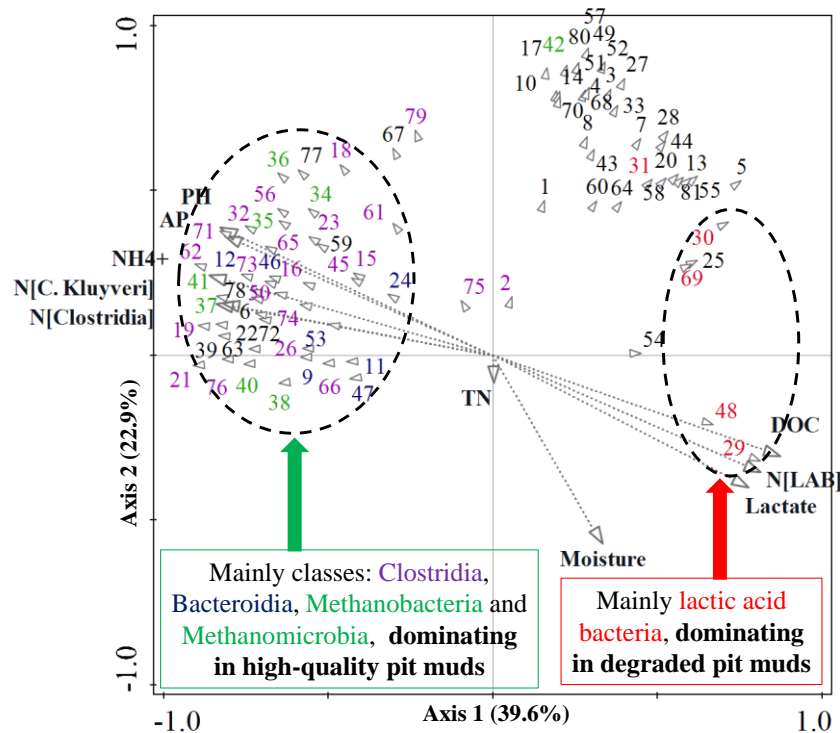

**Fig. S3** Redundancy analysis of biogeochemical attributes and 81 targeted genera (abundance >0.1 % in at least one sample) in all samples. Arrows indicate the direction and magnitude of biogeochemical attributes associated with microbial community structures. 1:Acetobacter, 2:Acidaminococcus, 3:Acinetobacter, 4:Actinomyces, 5:Alicyclobacillus, 6:Aminobacterium, 7:Arthrobacter, 8:Bacillus, 9:*Bacteroides*, 10:Balneimonas, 11:*BF311*, 12:*Blvii28*, 13:Brochothrix, 14:Bulleidia, 15:*Caldicoprobacter*, 16:*Caloramator*, 17:Candidatus\_Nitrososphaera, 18:*Clostridiaceae\_Clostridium*, 19:*Coprococcus*, 20:*Corynebacterium*, 21:*Dehalobacterium*, 22:Desulfococcus, 23:*Desulfosporosinus*, 24:*Dysgonomonas*, 25:Enhydrobacter, 26:*Garciella*, 27:Hyphomicrobium, 28:Kaistobacter, 29:*Lactobacillus*, 30:*Lactococcus*, 31:*Leuconostoc*, 32:*Lutispora*, 33:Lysinibacillus, 34:*Methanobacterium*, 35:*Methanobrevibacter*, 36:*Methanocorpusculum*, 37:*Methanoculleus*, 38:*Methanofollis*, 39:Methanomassiliicoccus, 40:*Methanosaeta*, 41:*Methanosarcina*, 42:*Methanosphaera*, 43:Mycobacterium, 44:Myroides, 45:*Oscillospira*, 46:*Paludibacter*, 47:*Parabacteroides*, 48:*Pediococcus*, 49:Pedomicrobium, 50:*Pelotomaculum*, 51:Petrobacter, 52:Plesiocystis, 53:*Prevotella*, 54:Providencia, 55:Pseudomonas, 56:*Pseudoramibacter\_Eubacterium*, 57:Pseudoxanthomonas, 58:Psychrobacter, 59:RFN20, 60:Rhodoplanes, 61:*Ruminococcus*, 62:*Sedimentibacter*, 63:SHD-231, 64:Sphingobacterium, 65:*Sporanaerobacter*, 66:*Sporotomaculum*, 67:Staphylococcus, 68:Steroidobacter, 69:*Streptococcus*, 70:Streptomyces, 71:*Syntrophomonas*, 72:T78, 73:*Tepidimicrobium*, 74:*Thermacetogenium*, 75:*Thermoanaerobacterium*, 76:*Tissierella\_Soehngenia*, 77:Treponema, 78:vadinCA11, 79:*VadinHB04*, 80:Vogesella, 81:Yersinia. According to the distribution of genera of *Clostridia* (purple font), *Bacteroidia* (blue font), methanogens (i.e. *Methanobacteria*, *Methanomicrobia*, green font) and lactic acid bacteria (LAB, red font) observed in Fig. S3, two circles were manually drawn.

## Tables

### Table S1

The detailed sensory characteristics of degraded, normal and high-quality FPMs.

| Sensory characteristics | Quality grades of fermentation pit muds                                                           |                                                                                                  |                                                                                                         |
|-------------------------|---------------------------------------------------------------------------------------------------|--------------------------------------------------------------------------------------------------|---------------------------------------------------------------------------------------------------------|
|                         | Degraded                                                                                          | Normal                                                                                           | High quality                                                                                            |
| Color                   | silvery-gray                                                                                      | earth-color                                                                                      | grey-black                                                                                              |
| Texture                 | white lumps or aciform crystals                                                                   | moist, soft and uniform texture                                                                  | moist, soft and uniform texture                                                                         |
| Odor                    | no or little ester aroma                                                                          | ester aroma                                                                                      | strong ester aroma, hydrogen sulfide and ammonia odor                                                   |
| Figures of pit muds     | <br>Degraded FPM | <br>Normal FPM | <br>High quality FPM |

**Table S2**

Relative abundances (% of total good quality sequences) of all phyla in each sample within different type of FPM. Twenty phyla with pink shading were shared by all samples, and total abundances of them in each sample were shown in the last line.

| Phyla                         | Degraded     |              |              |              | Normal       |              |              |              | High quality |              |              |              |
|-------------------------------|--------------|--------------|--------------|--------------|--------------|--------------|--------------|--------------|--------------|--------------|--------------|--------------|
|                               | S1           | S2           | S3           | S4           | S5           | S6           | S7           | S8           | S9           | S10          | S11          | S12          |
| <i>Firmicutes</i>             | 92.75        | 91.68        | 87.00        | 93.73        | 85.89        | 31.48        | 65.98        | 25.90        | 36.04        | 24.12        | 24.18        | 40.30        |
| <i>Eurvarchaeota</i>          | 1.14         | 1.24         | 0.97         | 0.74         | 0.75         | 33.97        | 26.58        | 55.29        | 18.18        | 37.68        | 34.98        | 19.43        |
| <i>Bacteroidetes</i>          | 1.16         | 1.04         | 1.41         | 0.95         | 0.88         | 2.94         | 1.58         | 9.15         | 26.78        | 28.79        | 28.70        | 25.78        |
| <i>Proteobacteria</i>         | 1.72         | 2.14         | 5.95         | 1.63         | 4.19         | 11.13        | 1.47         | 0.79         | 1.46         | 0.91         | 1.11         | 1.43         |
| <i>WWE1</i>                   | 0.10         | 0.05         | 0.07         | 0.09         | 0.08         | 0.08         | 0.08         | 0.95         | 3.55         | 5.01         | 5.15         | 7.39         |
| <i>Actinobacteria</i>         | 0.51         | 0.81         | 1.51         | 0.40         | 1.99         | 10.43        | 0.53         | 0.20         | 0.36         | 0.77         | 0.19         | 1.18         |
| <i>Chloroflexi</i>            | 0.19         | 0.26         | 0.14         | 0.12         | 0.59         | 0.78         | 0.49         | 2.27         | 1.38         | 0.08         | 1.00         | 0.13         |
| <i>Crenarchaeota</i>          | 0.08         | 0.17         | 0.15         | 0.06         | 0.96         | 3.81         | 0.08         | 0.08         | 0.13         | 0.09         | 0.13         | 0.09         |
| <i>Synergistetes</i>          | 0.15         | 0.13         | 0.09         | 0.18         | 0.11         | 0.21         | 0.21         | 1.95         | 0.89         | 0.68         | 0.33         | 0.66         |
| <i>Acidobacteria</i>          | 0.08         | 0.09         | 0.21         | 0.08         | 0.62         | 0.87         | 0.08         | 0.02         | 0.05         | 0.03         | 0.09         | 0.06         |
| <i>Verrucomicrobia</i>        | 0.03         | 0.03         | 0.05         | 0.03         | 0.08         | 0.14         | 0.04         | 0.07         | 0.26         | 0.11         | 0.28         | 0.19         |
| <i>Nitrospirae</i>            | 0.01         | 0.06         | 0.11         | 0.03         | 0.21         | 0.68         | 0.03         | 0.01         | 0.04         | 0.01         | 0.01         | 0.07         |
| <i>Planctomycetes</i>         | 0.01         | 0.02         | 0.15         | 0.02         | 0.14         | 0.27         | 0.04         | 0.08         | 0.04         | 0.01         | 0.19         | 0.03         |
| <i>WS1</i>                    | 0.03         | 0.04         | 0.02         | 0.02         | 0.03         | 0.02         | 0.04         | 0.04         | 0.04         | 0.01         | 0.02         | 0.01         |
| <i>Chlorobi</i>               | 0.01         | 0.01         | 0.01         | 0.02         | 0.02         | 0.01         | 0.01         | 0.01         | 0.03         | 0.02         | 0.01         | 0.02         |
| <i>Tenericutes</i>            | 0.01         | 0.01         | 0.01         | 0.01         | 0.00         | 0.01         | 0.03         | 0.18         | 1.01         | 0.06         | 0.17         | 0.00         |
| <i>Gemmatimonadetes</i>       | 0.03         | 0.03         | 0.01         | 0.01         | 0.21         | 0.75         | 0.02         | 0.00         | 0.02         | 0.01         | 0.01         | 0.01         |
| <i>Lentisphaerae</i>          | 0.01         | 0.01         | 0.01         | 0.02         | 0.00         | 0.01         | 0.01         | 0.41         | 0.21         | 0.01         | 0.28         | 0.00         |
| <i>Spirochaetes</i>           | 0.01         | 0.01         | 0.01         | 0.00         | 0.01         | 0.05         | 0.01         | 0.04         | 0.08         | 0.02         | 0.02         | 0.21         |
| <i>OP9</i>                    | 0.00         | 0.01         | 0.00         | 0.00         | 0.00         | 0.00         | 0.04         | 0.00         | 0.33         | 0.00         | 0.02         | 0.01         |
| <i>Armatimonadetes</i>        | 0.00         | 0.00         | 0.00         | 0.00         | 0.00         | 0.00         | 0.02         | 0.08         | 0.00         | 0.00         | 0.07         | 0.00         |
| <i>Cyanobacteria</i>          | 0.04         | 0.01         | 0.02         | 0.02         | 0.04         | 0.00         | 0.01         | 0.01         | 0.01         | 0.00         | 0.01         | 0.00         |
| <i>Caldithrix</i>             | 0.01         | 0.01         | 0.01         | 0.02         | 0.01         | 0.00         | 0.03         | 0.00         | 0.03         | 0.00         | 0.00         | 0.01         |
| <i>WS3</i>                    | 0.00         | 0.00         | 0.01         | 0.01         | 0.02         | 0.02         | 0.00         | 0.00         | 0.01         | 0.00         | 0.00         | 0.00         |
| <i>Thermi</i>                 | 0.00         | 0.00         | 0.01         | 0.00         | 0.00         | 0.01         | 0.01         | 0.00         | 0.01         | 0.00         | 0.01         | 0.01         |
| <i>GAL15</i>                  | 0.00         | 0.00         | 0.00         | 0.00         | 0.00         | 0.04         | 0.00         | 0.00         | 0.00         | 0.00         | 0.00         | 0.00         |
| <i>TA06</i>                   | 0.00         | 0.00         | 0.00         | 0.00         | 0.00         | 0.00         | 0.00         | 0.00         | 0.04         | 0.00         | 0.00         | 0.00         |
| <i>TM7</i>                    | 0.00         | 0.00         | 0.00         | 0.00         | 0.01         | 0.02         | 0.00         | 0.00         | 0.00         | 0.00         | 0.00         | 0.00         |
| <i>Fusobacteria</i>           | 0.01         | 0.00         | 0.01         | 0.00         | 0.00         | 0.00         | 0.00         | 0.00         | 0.01         | 0.00         | 0.00         | 0.01         |
| <i>TM6</i>                    | 0.00         | 0.00         | 0.00         | 0.00         | 0.00         | 0.02         | 0.00         | 0.00         | 0.00         | 0.00         | 0.00         | 0.00         |
| <i>Deferribacteres</i>        | 0.00         | 0.00         | 0.00         | 0.01         | 0.00         | 0.01         | 0.00         | 0.00         | 0.00         | 0.00         | 0.00         | 0.00         |
| <i>Fibrobacteres</i>          | 0.00         | 0.00         | 0.00         | 0.00         | 0.00         | 0.00         | 0.00         | 0.00         | 0.00         | 0.00         | 0.01         | 0.00         |
| <i>OD1</i>                    | 0.00         | 0.00         | 0.00         | 0.01         | 0.00         | 0.00         | 0.00         | 0.00         | 0.00         | 0.00         | 0.00         | 0.00         |
| <b>Total shared phyla</b>     | <b>97.95</b> | <b>97.77</b> | <b>97.82</b> | <b>98.09</b> | <b>96.54</b> | <b>96.83</b> | <b>97.24</b> | <b>96.82</b> | <b>89.21</b> | <b>98.34</b> | <b>96.36</b> | <b>96.79</b> |
| <b>Total identified phyla</b> | <b>98.07</b> | <b>97.85</b> | <b>97.91</b> | <b>98.18</b> | <b>96.84</b> | <b>97.77</b> | <b>97.41</b> | <b>97.53</b> | <b>90.96</b> | <b>98.44</b> | <b>96.95</b> | <b>97.05</b> |

**Table S3**

Relative abundances (% of total good quality sequences) of all classified classes in each sample within different type of FPM. Seven dominant classes with pink shading were shared by all samples, and total abundances of them in each sample were shown in the last line.

| Class                        | Degraded |       |       |       | Normal |       |       |       | High quality |       |       |       | Average |
|------------------------------|----------|-------|-------|-------|--------|-------|-------|-------|--------------|-------|-------|-------|---------|
|                              | S1       | S2    | S3    | S4    | S5     | S6    | S7    | S8    | S9           | S10   | S11   | S12   |         |
| <i>Bacilli</i>               | 85.56    | 85.46 | 81.54 | 89.10 | 7.84   | 8.73  | 4.84  | 2.67  | 4.26         | 2.69  | 3.74  | 4.48  | 31.74   |
| <i>Clostridia</i>            | 6.59     | 5.67  | 4.91  | 4.13  | 76.47  | 22.09 | 58.56 | 22.25 | 30.32        | 20.26 | 19.62 | 34.11 | 25.42   |
| <i>Methanobacteria</i>       | 0.83     | 0.90  | 0.77  | 0.53  | 0.50   | 33.16 | 24.51 | 44.22 | 11.37        | 29.80 | 4.66  | 15.27 | 13.88   |
| <i>Bacteroidia</i>           | 1.08     | 0.96  | 0.84  | 0.83  | 0.84   | 2.78  | 1.55  | 9.08  | 26.66        | 28.74 | 28.63 | 25.71 | 10.64   |
| <i>Methanomicrobia</i>       | 0.26     | 0.32  | 0.19  | 0.20  | 0.22   | 0.76  | 2.02  | 7.48  | 5.79         | 7.57  | 30.17 | 3.13  | 4.84    |
| <i>Cloacamonae</i>           | 0.10     | 0.05  | 0.07  | 0.09  | 0.08   | 0.08  | 0.08  | 0.95  | 3.55         | 5.01  | 5.15  | 7.39  | 1.88    |
| <i>Gammaproteobacteria</i>   | 0.72     | 0.66  | 4.09  | 0.67  | 1.30   | 3.90  | 0.60  | 0.28  | 0.57         | 0.31  | 0.32  | 0.49  | 1.16    |
| <i>Alphaproteobacteria</i>   | 0.24     | 0.34  | 0.68  | 0.20  | 1.30   | 3.17  | 0.15  | 0.08  | 0.17         | 0.10  | 0.23  | 0.20  | 0.57    |
| <i>Deltaproteobacteria</i>   | 0.37     | 0.59  | 0.48  | 0.42  | 0.70   | 1.12  | 0.45  | 0.22  | 0.52         | 0.29  | 0.38  | 0.48  | 0.50    |
| <i>Anaerolineae</i>          | 0.14     | 0.18  | 0.08  | 0.08  | 0.14   | 0.15  | 0.45  | 2.24  | 1.33         | 0.07  | 0.98  | 0.12  | 0.50    |
| <i>Actinobacteria</i>        | 0.27     | 0.43  | 1.13  | 0.25  | 0.88   | 2.23  | 0.11  | 0.12  | 0.18         | 0.06  | 0.09  | 0.21  | 0.50    |
| <i>Thermoplasmata</i>        | 0.05     | 0.01  | 0.01  | 0.01  | 0.04   | 0.04  | 0.06  | 3.35  | 0.96         | 0.28  | 0.14  | 0.97  | 0.49    |
| <i>Thaumarchaeota</i>        | 0.07     | 0.16  | 0.14  | 0.05  | 0.94   | 3.78  | 0.08  | 0.06  | 0.11         | 0.08  | 0.11  | 0.09  | 0.47    |
| <i>Synergistia</i>           | 0.15     | 0.13  | 0.09  | 0.18  | 0.11   | 0.21  | 0.21  | 1.95  | 0.89         | 0.68  | 0.33  | 0.66  | 0.47    |
| <i>Betaproteobacteria</i>    | 0.23     | 0.26  | 0.56  | 0.20  | 0.63   | 2.71  | 0.15  | 0.10  | 0.12         | 0.11  | 0.09  | 0.14  | 0.44    |
| <i>Thermoleophilia</i>       | 0.08     | 0.22  | 0.19  | 0.03  | 0.57   | 2.55  | 0.04  | 0.05  | 0.04         | 0.01  | 0.03  | 0.06  | 0.32    |
| <i>MB-A2-108</i>             | 0.01     | 0.08  | 0.02  | 0.05  | 0.13   | 1.26  | 0.03  | 0.01  | 0.01         | 0.01  | 0.02  | 0.02  | 0.14    |
| <i>Nitrospira</i>            | 0.01     | 0.06  | 0.11  | 0.03  | 0.21   | 0.68  | 0.03  | 0.01  | 0.04         | 0.01  | 0.01  | 0.07  | 0.11    |
| <i>Ignavibacteria</i>        | 0.01     | 0.01  | 0.01  | 0.02  | 0.02   | 0.01  | 0.01  | 0.01  | 0.03         | 0.02  | 0.01  | 0.02  | 0.02    |
| <i>Planctomycetia</i>        | 0.01     | 0.01  | 0.10  | 0.01  | 0.08   | 0.17  | 0.01  | 0.06  | 0.04         | 0.01  | 0.18  | 0.02  | 0.06    |
| <i>Epsilonproteobacteria</i> | 0.04     | 0.07  | 0.03  | 0.04  | 0.05   | 0.02  | 0.06  | 0.03  | 0.01         | 0.04  | 0.06  | 0.04  | 0.04    |
| <i>Coriobacteriia</i>        | 0.09     | 0.02  | 0.03  | 0.02  | 0.15   | 2.15  | 0.29  | 0.00  | 0.06         | 0.67  | 0.01  | 0.85  | 0.36    |
| <i>Mollicutes</i>            | 0.00     | 0.01  | 0.01  | 0.01  | 0.00   | 0.01  | 0.01  | 0.08  | 0.88         | 0.06  | 0.13  | 0.00  | 0.10    |
| <i>Acidimicrobiia</i>        | 0.04     | 0.03  | 0.05  | 0.03  | 0.20   | 0.74  | 0.01  | 0.00  | 0.02         | 0.01  | 0.01  | 0.02  | 0.10    |
| <i>Gemm-1</i>                | 0.03     | 0.03  | 0.01  | 0.01  | 0.20   | 0.69  | 0.01  | 0.00  | 0.01         | 0.01  | 0.01  | 0.01  | 0.08    |
| <i>Lentisphaeria</i>         | 0.01     | 0.01  | 0.01  | 0.02  | 0.00   | 0.01  | 0.01  | 0.41  | 0.21         | 0.01  | 0.28  | 0.00  | 0.08    |
| <i>Acidobacteria-6</i>       | 0.01     | 0.03  | 0.05  | 0.01  | 0.28   | 0.37  | 0.04  | 0.02  | 0.00         | 0.01  | 0.02  | 0.03  | 0.07    |
| <i>Verruco-5</i>             | 0.00     | 0.00  | 0.00  | 0.01  | 0.01   | 0.04  | 0.02  | 0.05  | 0.25         | 0.10  | 0.23  | 0.14  | 0.07    |
| <i>Erysipelotrichi</i>       | 0.00     | 0.00  | 0.00  | 0.01  | 0.01   | 0.12  | 0.01  | 0.01  | 0.49         | 0.03  | 0.06  | 0.00  | 0.06    |
| <i>Ellin6529</i>             | 0.01     | 0.03  | 0.01  | 0.00  | 0.25   | 0.29  | 0.02  | 0.00  | 0.01         | 0.01  | 0.00  | 0.00  | 0.05    |
| <i>Chloracidobacteria</i>    | 0.02     | 0.01  | 0.10  | 0.01  | 0.25   | 0.14  | 0.01  | 0.00  | 0.01         | 0.01  | 0.01  | 0.00  | 0.05    |
| <i>Gitt-GS-136</i>           | 0.01     | 0.03  | 0.04  | 0.02  | 0.14   | 0.27  | 0.00  | 0.01  | 0.00         | 0.00  | 0.00  | 0.00  | 0.04    |
| <i>Flavobacteriia</i>        | 0.06     | 0.03  | 0.21  | 0.03  | 0.01   | 0.07  | 0.00  | 0.00  | 0.01         | 0.01  | 0.01  | 0.01  | 0.04    |
| <i>Spirochaetes</i>          | 0.01     | 0.01  | 0.01  | 0.00  | 0.01   | 0.05  | 0.01  | 0.04  | 0.08         | 0.02  | 0.02  | 0.20  | 0.04    |
| <i>Sphingobacteriia</i>      | 0.01     | 0.00  | 0.29  | 0.00  | 0.00   | 0.07  | 0.00  | 0.00  | 0.02         | 0.00  | 0.00  | 0.00  | 0.03    |
| <i>Pedospaerae</i>           | 0.01     | 0.01  | 0.01  | 0.02  | 0.04   | 0.05  | 0.01  | 0.02  | 0.00         | 0.01  | 0.06  | 0.06  | 0.03    |
| <i>RF3</i>                   | 0.01     | 0.00  | 0.00  | 0.00  | 0.00   | 0.01  | 0.01  | 0.09  | 0.13         | 0.00  | 0.04  | 0.00  | 0.02    |
| <i>JS1</i>                   | 0.00     | 0.01  | 0.00  | 0.00  | 0.00   | 0.00  | 0.01  | 0.00  | 0.24         | 0.00  | 0.00  | 0.00  | 0.02    |
| <i>OPB54</i>                 | 0.01     | 0.03  | 0.03  | 0.00  | 0.02   | 0.01  | 0.01  | 0.05  | 0.01         | 0.01  | 0.03  | 0.01  | 0.02    |
| <i>Zetaproteobacteria</i>    | 0.01     | 0.01  | 0.01  | 0.02  | 0.02   | 0.01  | 0.00  | 0.01  | 0.04         | 0.01  | 0.01  | 0.01  | 0.01    |
| <i>SJA-176</i>               | 0.00     | 0.00  | 0.00  | 0.00  | 0.00   | 0.00  | 0.02  | 0.08  | 0.00         | 0.00  | 0.07  | 0.00  | 0.01    |
| <i>iii1-8</i>                | 0.01     | 0.00  | 0.00  | 0.00  | 0.03   | 0.10  | 0.00  | 0.00  | 0.01         | 0.00  | 0.00  | 0.03  | 0.01    |
| <i>Cytophagia</i>            | 0.01     | 0.01  | 0.02  | 0.05  | 0.00   | 0.01  | 0.01  | 0.02  | 0.01         | 0.01  | 0.00  | 0.01  | 0.01    |
| <i>Chloroplast</i>           | 0.04     | 0.01  | 0.02  | 0.02  | 0.04   | 0.00  | 0.01  | 0.01  | 0.01         | 0.00  | 0.01  | 0.00  | 0.01    |
| <i>OPB46</i>                 | 0.00     | 0.01  | 0.00  | 0.00  | 0.00   | 0.00  | 0.02  | 0.00  | 0.09         | 0.00  | 0.02  | 0.01  | 0.01    |
| <i>Sva0725</i>               | 0.01     | 0.00  | 0.00  | 0.00  | 0.00   | 0.12  | 0.00  | 0.00  | 0.01         | 0.00  | 0.00  | 0.00  | 0.01    |
| <i>Caldithrixae</i>          | 0.01     | 0.01  | 0.01  | 0.02  | 0.01   | 0.00  | 0.03  | 0.00  | 0.03         | 0.00  | 0.00  | 0.01  | 0.01    |
| <i>Spartobacteria</i>        | 0.01     | 0.00  | 0.03  | 0.00  | 0.04   | 0.04  | 0.00  | 0.00  | 0.01         | 0.00  | 0.00  | 0.00  | 0.01    |
| <i>Rubrobacteria</i>         | 0.01     | 0.01  | 0.01  | 0.01  | 0.01   | 0.07  | 0.00  | 0.00  | 0.00         | 0.00  | 0.00  | 0.00  | 0.01    |
| <i>MCG</i>                   | 0.01     | 0.01  | 0.01  | 0.01  | 0.01   | 0.01  | 0.01  | 0.01  | 0.01         | 0.01  | 0.01  | 0.00  | 0.01    |
| <i>Saprosphirae</i>          | 0.00     | 0.01  | 0.00  | 0.03  | 0.01   | 0.02  | 0.00  | 0.01  | 0.00         | 0.01  | 0.01  | 0.01  | 0.01    |
| <i>Acidobacteriia</i>        | 0.01     | 0.00  | 0.03  | 0.01  | 0.01   | 0.00  | 0.01  | 0.00  | 0.01         | 0.01  | 0.01  | 0.00  | 0.01    |
| <i>DA052</i>                 | 0.01     | 0.00  | 0.01  | 0.01  | 0.03   | 0.00  | 0.01  | 0.00  | 0.00         | 0.00  | 0.01  | 0.00  | 0.01    |
| <i>OPB41</i>                 | 0.00     | 0.00  | 0.01  | 0.01  | 0.01   | 0.04  | 0.00  | 0.01  | 0.00         | 0.00  | 0.00  | 0.00  | 0.01    |
| <i>PRR-12</i>                | 0.00     | 0.00  | 0.01  | 0.01  | 0.02   | 0.02  | 0.00  | 0.00  | 0.01         | 0.00  | 0.00  | 0.00  | 0.01    |
| <i>TMI</i>                   | 0.00     | 0.00  | 0.01  | 0.01  | 0.01   | 0.01  | 0.01  | 0.00  | 0.02         | 0.00  | 0.00  | 0.00  | 0.01    |
| <i>TK10</i>                  | 0.00     | 0.00  | 0.00  | 0.00  | 0.03   | 0.03  | 0.00  | 0.00  | 0.00         | 0.00  | 0.00  | 0.00  | 0.00    |
| <i>Pla3</i>                  | 0.00     | 0.01  | 0.01  | 0.00  | 0.00   | 0.04  | 0.00  | 0.00  | 0.00         | 0.00  | 0.01  | 0.00  | 0.00    |
| <i>S035</i>                  | 0.00     | 0.01  | 0.00  | 0.00  | 0.00   | 0.04  | 0.00  | 0.00  | 0.00         | 0.00  | 0.00  | 0.00  | 0.00    |



|                               |              |              |              |              |              |              |              |              |              |             |             |              |              |
|-------------------------------|--------------|--------------|--------------|--------------|--------------|--------------|--------------|--------------|--------------|-------------|-------------|--------------|--------------|
| <i>Deinococci</i>             | 0.00         | 0.00         | 0.01         | 0.00         | 0.00         | 0.01         | 0.01         | 0.00         | 0.01         | 0.00        | 0.01        | 0.01         | 0.00         |
| <i>OM190</i>                  | 0.00         | 0.00         | 0.02         | 0.00         | 0.01         | 0.01         | 0.00         | 0.00         | 0.00         | 0.00        | 0.00        | 0.00         | 0.00         |
| <i>OS-K</i>                   | 0.01         | 0.01         | 0.00         | 0.01         | 0.01         | 0.00         | 0.00         | 0.00         | 0.00         | 0.01        | 0.00        | 0.00         | 0.00         |
| <i>Acidobacteria-5</i>        | 0.00         | 0.00         | 0.01         | 0.00         | 0.00         | 0.01         | 0.01         | 0.00         | 0.00         | 0.00        | 0.01        | 0.01         | 0.00         |
| <i>Solibacteres</i>           | 0.00         | 0.02         | 0.00         | 0.00         | 0.00         | 0.00         | 0.01         | 0.00         | 0.00         | 0.00        | 0.01        | 0.00         | 0.00         |
| <i>028H05-P-BN-P5</i>         | 0.00         | 0.00         | 0.00         | 0.00         | 0.01         | 0.01         | 0.00         | 0.00         | 0.00         | 0.01        | 0.00        | 0.00         | 0.00         |
| <i>Gemmatimonadetes</i>       | 0.00         | 0.00         | 0.00         | 0.00         | 0.00         | 0.01         | 0.01         | 0.00         | 0.01         | 0.00        | 0.00        | 0.00         | 0.00         |
| <i>Fusobacteriia</i>          | 0.01         | 0.00         | 0.01         | 0.00         | 0.00         | 0.00         | 0.00         | 0.00         | 0.01         | 0.00        | 0.00        | 0.01         | 0.00         |
| <i>SAR202</i>                 | 0.01         | 0.00         | 0.00         | 0.00         | 0.00         | 0.00         | 0.01         | 0.00         | 0.00         | 0.00        | 0.00        | 0.01         | 0.00         |
| <i>SJA-4</i>                  | 0.00         | 0.00         | 0.00         | 0.00         | 0.00         | 0.02         | 0.00         | 0.00         | 0.00         | 0.00        | 0.00        | 0.00         | 0.00         |
| <i>Gemm-2</i>                 | 0.00         | 0.00         | 0.00         | 0.00         | 0.01         | 0.01         | 0.00         | 0.00         | 0.00         | 0.00        | 0.00        | 0.01         | 0.00         |
| <i>BPC102</i>                 | 0.01         | 0.00         | 0.00         | 0.00         | 0.00         | 0.00         | 0.00         | 0.00         | 0.00         | 0.00        | 0.01        | 0.00         | 0.00         |
| <i>Opitutae</i>               | 0.01         | 0.00         | 0.00         | 0.00         | 0.00         | 0.00         | 0.01         | 0.00         | 0.00         | 0.00        | 0.00        | 0.00         | 0.00         |
| <i>TM7-3</i>                  | 0.00         | 0.00         | 0.00         | 0.00         | 0.00         | 0.01         | 0.00         | 0.00         | 0.00         | 0.00        | 0.00        | 0.00         | 0.00         |
| <i>MJK10</i>                  | 0.00         | 0.00         | 0.00         | 0.00         | 0.01         | 0.01         | 0.00         | 0.00         | 0.00         | 0.00        | 0.00        | 0.00         | 0.00         |
| <i>MBGB</i>                   | 0.00         | 0.01         | 0.00         | 0.00         | 0.00         | 0.01         | 0.00         | 0.00         | 0.00         | 0.00        | 0.00        | 0.00         | 0.00         |
| <i>Leptospirae</i>            | 0.00         | 0.00         | 0.00         | 0.00         | 0.00         | 0.00         | 0.01         | 0.00         | 0.00         | 0.00        | 0.00        | 0.01         | 0.00         |
| <i>MBGA</i>                   | 0.00         | 0.00         | 0.00         | 0.01         | 0.00         | 0.01         | 0.00         | 0.00         | 0.00         | 0.00        | 0.00        | 0.00         | 0.00         |
| <i>Deferribacteres</i>        | 0.00         | 0.00         | 0.00         | 0.01         | 0.00         | 0.01         | 0.00         | 0.00         | 0.00         | 0.00        | 0.00        | 0.00         | 0.00         |
| <i>Thermomicrobia</i>         | 0.01         | 0.00         | 0.00         | 0.00         | 0.00         | 0.00         | 0.00         | 0.01         | 0.00         | 0.00        | 0.00        | 0.00         | 0.00         |
| <i>RB25</i>                   | 0.00         | 0.01         | 0.01         | 0.00         | 0.00         | 0.00         | 0.00         | 0.00         | 0.00         | 0.00        | 0.00        | 0.00         | 0.00         |
| <i>MHVG</i>                   | 0.00         | 0.00         | 0.00         | 0.00         | 0.00         | 0.00         | 0.00         | 0.00         | 0.01         | 0.00        | 0.00        | 0.00         | 0.00         |
| <i>Dehalococcoidetes</i>      | 0.00         | 0.00         | 0.00         | 0.00         | 0.00         | 0.00         | 0.00         | 0.00         | 0.00         | 0.00        | 0.01        | 0.00         | 0.00         |
| <i>TG3</i>                    | 0.00         | 0.00         | 0.00         | 0.00         | 0.00         | 0.00         | 0.00         | 0.00         | 0.00         | 0.00        | 0.01        | 0.00         | 0.00         |
| <i>BME43</i>                  | 0.00         | 0.01         | 0.00         | 0.00         | 0.00         | 0.00         | 0.00         | 0.00         | 0.00         | 0.00        | 0.00        | 0.00         | 0.00         |
| <i>ZB2</i>                    | 0.00         | 0.00         | 0.00         | 0.01         | 0.00         | 0.00         | 0.00         | 0.00         | 0.00         | 0.00        | 0.00        | 0.00         | 0.00         |
| <b>Total dominant classes</b> | <b>95.13</b> | <b>94.03</b> | <b>92.42</b> | <b>95.54</b> | <b>87.25</b> | <b>71.49</b> | <b>92.16</b> | <b>86.95</b> | <b>82.51</b> | <b>94.4</b> | <b>92.3</b> | <b>90.59</b> | <b>89.56</b> |

**Table S4**

Relative abundances (% of total classified sequences that can be identified into known genera) of classified genus in each sample within different type of FPM. Twenty seven genera with pink shading were shared by all samples. Total relative abundance of shared genera (% of total classified genera) in each sample and abundance of total classified genera (% of total good quality sequences) in each sample were shown in the last two lines.

| Genus                                      | Degraded |       |       |       | Normal |       |       |       | High quality |       |       |       |
|--------------------------------------------|----------|-------|-------|-------|--------|-------|-------|-------|--------------|-------|-------|-------|
|                                            | S1       | S2    | S3    | S4    | S5     | S6    | S7    | S8    | S9           | S10   | S11   | S12   |
| <i>Lactobacillus</i>                       | 92.01    | 92.62 | 86.58 | 94.64 | 8.05   | 10.30 | 6.98  | 2.87  | 9.38         | 4.30  | 4.46  | 7.67  |
| <i>Leuconostoc</i>                         | 0.08     | 0.10  | 0.06  | 0.04  | 0.08   | 0.15  | 0.01  | 0.02  | 0.08         | 0.04  | 0.04  | 0.06  |
| <i>Methanocorpusculum</i>                  | 0.02     | 0.02  | 0.01  | 0.01  | 0.03   | 0.14  | 0.06  | 0.07  | 0.04         | 0.05  | 0.10  | 0.11  |
| <i>Acetobacter</i>                         | 0.02     | 0.02  | 0.12  | 0.04  | 0.03   | 0.07  | 0.01  | 0.01  | 0.10         | 0.01  | 0.06  | 0.04  |
| <i>Ruminococcus</i>                        | 2.27     | 1.56  | 1.66  | 1.36  | 77.77  | 28.29 | 46.51 | 13.48 | 6.47         | 14.18 | 0.91  | 18.31 |
| <i>Methanobrevibacter</i>                  | 0.40     | 0.45  | 0.40  | 0.29  | 0.24   | 17.66 | 3.18  | 33.38 | 22.50        | 51.71 | 2.42  | 26.09 |
| <i>Methanosarcina</i>                      | 0.18     | 0.25  | 0.15  | 0.18  | 0.20   | 1.48  | 2.97  | 5.51  | 5.52         | 12.32 | 57.52 | 4.18  |
| <i>Caloramator</i>                         | 0.85     | 0.19  | 0.09  | 0.12  | 3.58   | 1.60  | 23.09 | 1.16  | 2.99         | 2.16  | 0.25  | 5.59  |
| <i>Methanobacterium</i>                    | 0.29     | 0.35  | 0.37  | 0.20  | 0.25   | 4.44  | 3.66  | 19.83 | 5.64         | 1.24  | 1.37  | 1.08  |
| <i>Syntrophomonas</i>                      | 0.17     | 0.19  | 0.18  | 0.12  | 0.30   | 1.55  | 0.37  | 1.93  | 7.99         | 3.00  | 6.11  | 9.82  |
| <i>Sedimentibacter</i>                     | 0.46     | 0.48  | 0.44  | 0.28  | 1.21   | 1.00  | 1.59  | 2.07  | 6.88         | 2.00  | 3.91  | 3.23  |
| <i>Clostridiaceae Clostridium</i>          | 0.54     | 1.14  | 0.71  | 0.54  | 0.95   | 2.69  | 2.62  | 0.71  | 4.42         | 0.66  | 1.74  | 2.08  |
| <i>Prevotella</i>                          | 0.08     | 0.08  | 0.08  | 0.07  | 0.09   | 0.20  | 0.12  | 0.26  | 0.19         | 1.84  | 0.06  | 8.25  |
| <i>Sporanaerobacter</i>                    | 0.25     | 0.12  | 0.08  | 0.15  | 0.18   | 1.07  | 3.90  | 0.59  | 0.74         | 0.41  | 0.49  | 2.12  |
| <i>Methanoculleus</i>                      | 0.06     | 0.06  | 0.05  | 0.02  | 0.05   | 0.12  | 0.17  | 3.83  | 0.64         | 0.84  | 1.91  | 1.57  |
| <i>T78</i>                                 | 0.02     | 0.01  | 0.02  | 0.03  | 0.03   | 0.05  | 0.53  | 2.82  | 3.14         | 0.01  | 1.84  | 0.07  |
| <i>Blvi28</i>                              | 0.02     | 0.02  | 0.01  | 0.04  | 0.06   | 0.14  | 0.06  | 0.89  | 0.87         | 0.10  | 4.82  | 0.12  |
| <i>Aminobacterium</i>                      | 0.13     | 0.12  | 0.03  | 0.11  | 0.08   | 0.31  | 0.17  | 2.14  | 1.55         | 1.10  | 0.32  | 0.69  |
| <i>Bacillaceae Bacillus</i>                | 0.20     | 0.22  | 0.14  | 0.04  | 0.07   | 3.04  | 0.04  | 0.01  | 0.12         | 0.04  | 0.84  | 0.04  |
| <i>Pseudomonas</i>                         | 0.19     | 0.08  | 1.70  | 0.16  | 0.11   | 1.24  | 0.07  | 0.04  | 0.19         | 0.13  | 0.07  | 0.06  |
| <i>Tissierella Soehngenia</i>              | 0.05     | 0.11  | 0.04  | 0.06  | 0.07   | 0.10  | 0.53  | 0.39  | 0.35         | 0.89  | 0.29  | 0.72  |
| <i>Coprococcus</i>                         | 0.08     | 0.08  | 0.08  | 0.06  | 0.18   | 0.10  | 0.52  | 0.26  | 0.54         | 0.19  | 0.27  | 1.01  |
| <i>Lutispora</i>                           | 0.04     | 0.02  | 0.03  | 0.02  | 0.37   | 0.19  | 0.29  | 0.08  | 0.19         | 0.22  | 0.43  | 0.26  |
| <i>Staphylococcus</i>                      | 0.05     | 0.13  | 0.13  | 0.13  | 0.17   | 0.26  | 0.12  | 0.11  | 0.35         | 0.14  | 0.17  | 0.17  |
| <i>Tepidimicrobium</i>                     | 0.09     | 0.02  | 0.05  | 0.03  | 0.09   | 0.12  | 0.54  | 0.12  | 0.10         | 0.05  | 0.23  | 0.25  |
| <i>Caldicoprobacter</i>                    | 0.05     | 0.06  | 0.07  | 0.08  | 0.05   | 0.12  | 0.25  | 0.20  | 0.43         | 0.01  | 0.25  | 0.07  |
| <i>Acinetobacter</i>                       | 0.04     | 0.04  | 0.39  | 0.03  | 0.07   | 0.75  | 0.04  | 0.04  | 0.06         | 0.03  | 0.09  | 0.06  |
| <i>Methanosaeta</i>                        | 0.01     | 0.02  | 0.01  | 0.01  | 0.01   | 0.00  | 0.20  | 1.18  | 9.05         | 0.06  | 1.01  | 0.06  |
| <i>Candidatus Nitrososphaera vadinCA11</i> | 0.05     | 0.05  | 0.13  | 0.00  | 1.20   | 8.43  | 0.07  | 0.01  | 0.17         | 0.01  | 0.09  | 0.07  |
| <i>Lactococcus</i>                         | 0.03     | 0.01  | 0.01  | 0.00  | 0.03   | 0.05  | 0.04  | 3.19  | 2.09         | 0.15  | 0.04  | 1.60  |
| <i>Methanomassiliicoccus</i>               | 0.31     | 0.19  | 2.52  | 0.33  | 0.15   | 2.18  | 0.12  | 0.03  | 0.25         | 0.05  | 0.16  | 0.00  |
| <i>Thermoanaerobacterium</i>               | 0.02     | 0.01  | 0.00  | 0.01  | 0.01   | 0.03  | 0.06  | 1.50  | 0.48         | 0.34  | 0.22  | 0.22  |
| <i>Thermoanaerobacterium</i>               | 0.00     | 0.02  | 0.02  | 0.00  | 1.37   | 0.02  | 0.08  | 0.01  | 0.02         | 0.00  | 0.03  | 0.01  |
| <i>Yersinia</i>                            | 0.07     | 0.03  | 0.18  | 0.05  | 0.06   | 0.31  | 0.05  | 0.01  | 0.06         | 0.01  | 0.00  | 0.04  |
| <i>Streptococcus</i>                       | 0.02     | 0.03  | 0.09  | 0.05  | 0.51   | 0.10  | 0.02  | 0.01  | 0.02         | 0.00  | 0.00  | 0.00  |
| <i>Treponema</i>                           | 0.02     | 0.00  | 0.01  | 0.00  | 0.01   | 0.12  | 0.01  | 0.06  | 0.17         | 0.03  | 0.01  | 0.39  |
| <i>Rhodoplanes</i>                         | 0.05     | 0.02  | 0.06  | 0.04  | 0.17   | 0.20  | 0.04  | 0.00  | 0.04         | 0.03  | 0.00  | 0.11  |
| <i>Corynebacterium</i>                     | 0.04     | 0.09  | 0.16  | 0.01  | 0.14   | 0.19  | 0.00  | 0.02  | 0.06         | 0.00  | 0.01  | 0.01  |
| <i>Desulfococcus</i>                       | 0.02     | 0.03  | 0.02  | 0.00  | 0.07   | 0.02  | 0.06  | 0.02  | 0.14         | 0.08  | 0.09  | 0.12  |
| <i>Enhydrobacter</i>                       | 0.02     | 0.01  | 0.39  | 0.04  | 0.01   | 0.12  | 0.01  | 0.00  | 0.00         | 0.03  | 0.01  | 0.01  |
| <i>Pediococcus</i>                         | 0.08     | 0.12  | 0.09  | 0.10  | 0.04   | 0.03  | 0.05  | 0.00  | 0.00         | 0.00  | 0.06  | 0.01  |
| <i>Thermoactinomyces</i>                   | 0.04     | 0.04  | 0.03  | 0.07  | 0.02   | 0.05  | 0.06  | 0.00  | 0.02         | 0.00  | 0.01  | 0.03  |
| <i>Gluconobacter</i>                       | 0.01     | 0.02  | 0.02  | 0.01  | 0.02   | 0.00  | 0.06  | 0.02  | 0.10         | 0.04  | 0.00  | 0.06  |
| <i>Arcobacter</i>                          | 0.02     | 0.04  | 0.02  | 0.03  | 0.03   | 0.00  | 0.04  | 0.03  | 0.04         | 0.04  | 0.04  | 0.01  |
| <i>Mycobacterium</i>                       | 0.01     | 0.03  | 0.01  | 0.01  | 0.07   | 0.15  | 0.01  | 0.00  | 0.00         | 0.00  | 0.01  | 0.03  |
| <i>Mariprofundus</i>                       | 0.01     | 0.02  | 0.02  | 0.02  | 0.03   | 0.03  | 0.00  | 0.02  | 0.10         | 0.03  | 0.03  | 0.01  |
| <i>Brevibacterium</i>                      | 0.03     | 0.06  | 0.04  | 0.04  | 0.02   | 0.02  | 0.01  | 0.01  | 0.00         | 0.01  | 0.03  | 0.01  |
| <i>Sulfurimonas</i>                        | 0.02     | 0.01  | 0.01  | 0.01  | 0.03   | 0.03  | 0.02  | 0.01  | 0.00         | 0.04  | 0.03  | 0.03  |
| <i>Ruminofilibacter</i>                    | 0.00     | 0.02  | 0.01  | 0.00  | 0.01   | 0.02  | 0.02  | 0.01  | 0.02         | 0.00  | 0.06  | 0.03  |
| <i>Brachybacterium</i>                     | 0.02     | 0.02  | 0.02  | 0.01  | 0.02   | 0.05  | 0.00  | 0.01  | 0.02         | 0.00  | 0.00  | 0.01  |
| <i>Pelotomaculum</i>                       | 0.02     | 0.01  | 0.00  | 0.00  | 0.00   | 0.02  | 0.01  | 0.09  | 1.96         | 0.00  | 2.46  | 0.04  |
| <i>Garciella</i>                           | 0.01     | 0.01  | 0.01  | 0.00  | 0.01   | 0.00  | 0.01  | 0.00  | 0.10         | 0.00  | 2.16  | 0.06  |
| <i>Kaistobacter</i>                        | 0.02     | 0.04  | 0.05  | 0.01  | 0.39   | 1.26  | 0.00  | 0.00  | 0.00         | 0.00  | 0.00  | 0.01  |
| <i>Steroidobacter</i>                      | 0.02     | 0.00  | 0.02  | 0.00  | 0.27   | 1.28  | 0.01  | 0.00  | 0.02         | 0.00  | 0.00  | 0.00  |
| <i>RFN20</i>                               | 0.00     | 0.00  | 0.00  | 0.01  | 0.02   | 0.03  | 0.02  | 0.02  | 1.34         | 0.03  | 0.12  | 0.00  |
| <i>Bacteroides</i>                         | 0.00     | 0.00  | 0.02  | 0.00  | 0.00   | 0.00  | 0.01  | 0.00  | 0.04         | 0.06  | 0.01  | 0.92  |

|                                      |      |      |      |      |      |      |      |      |      |      |      |      |
|--------------------------------------|------|------|------|------|------|------|------|------|------|------|------|------|
| <i>Thermacetogenium</i>              | 0.00 | 0.00 | 0.02 | 0.00 | 0.00 | 0.02 | 0.01 | 0.07 | 0.02 | 0.03 | 0.80 | 0.01 |
| <i>Methanosphaera</i>                | 0.00 | 0.00 | 0.00 | 0.00 | 0.00 | 0.78 | 0.00 | 0.01 | 0.00 | 0.00 | 0.00 | 0.00 |
| <i>vadinHB04</i>                     | 0.00 | 0.00 | 0.02 | 0.00 | 0.00 | 0.27 | 0.00 | 0.05 | 0.06 | 0.00 | 0.00 | 0.39 |
| <i>Psychrobacter</i>                 | 0.02 | 0.01 | 0.42 | 0.03 | 0.00 | 0.26 | 0.00 | 0.00 | 0.02 | 0.00 | 0.01 | 0.01 |
| <i>Methanofollis</i>                 | 0.00 | 0.00 | 0.00 | 0.00 | 0.00 | 0.00 | 0.01 | 0.02 | 0.06 | 0.48 | 0.12 | 0.01 |
| <i>Pedomicrobium</i>                 | 0.00 | 0.00 | 0.02 | 0.00 | 0.03 | 0.53 | 0.00 | 0.00 | 0.02 | 0.00 | 0.00 | 0.00 |
| <i>Lysinibacillus</i>                | 0.01 | 0.02 | 0.02 | 0.00 | 0.00 | 0.49 | 0.00 | 0.00 | 0.00 | 0.00 | 0.04 | 0.00 |
| <i>SHD-231</i>                       | 0.01 | 0.00 | 0.00 | 0.00 | 0.01 | 0.00 | 0.02 | 0.30 | 0.16 | 0.00 | 0.03 | 0.06 |
| <i>Dehalobacterium</i>               | 0.00 | 0.00 | 0.00 | 0.00 | 0.00 | 0.00 | 0.02 | 0.10 | 0.12 | 0.09 | 0.07 | 0.18 |
| <i>Alicyclobacillus</i>              | 0.05 | 0.08 | 0.07 | 0.00 | 0.03 | 0.29 | 0.01 | 0.00 | 0.00 | 0.00 | 0.00 | 0.00 |
| <i>Paludibacter</i>                  | 0.00 | 0.01 | 0.00 | 0.00 | 0.04 | 0.02 | 0.00 | 0.01 | 0.04 | 0.05 | 0.06 | 0.28 |
| <i>Pseudoramibacter_Eubacterium</i>  | 0.01 | 0.00 | 0.00 | 0.00 | 0.00 | 0.05 | 0.00 | 0.09 | 0.12 | 0.01 | 0.16 | 0.03 |
| <i>Hyphomicrobium</i>                | 0.00 | 0.02 | 0.01 | 0.01 | 0.04 | 0.37 | 0.00 | 0.00 | 0.02 | 0.00 | 0.00 | 0.00 |
| <i>Actinomyces</i>                   | 0.00 | 0.00 | 0.00 | 0.01 | 0.03 | 0.41 | 0.00 | 0.00 | 0.00 | 0.01 | 0.00 | 0.00 |
| <i>Sphingobacterium</i>              | 0.01 | 0.00 | 0.33 | 0.00 | 0.00 | 0.05 | 0.00 | 0.00 | 0.06 | 0.00 | 0.00 | 0.00 |
| <i>Oscillospira</i>                  | 0.01 | 0.00 | 0.00 | 0.00 | 0.00 | 0.03 | 0.04 | 0.02 | 0.00 | 0.01 | 0.00 | 0.32 |
| <i>Dysgonomonas</i>                  | 0.00 | 0.00 | 0.00 | 0.00 | 0.00 | 0.00 | 0.00 | 0.00 | 0.43 | 0.00 | 0.00 | 0.00 |
| <i>Pseudoxanthomonas</i>             | 0.00 | 0.00 | 0.00 | 0.00 | 0.00 | 0.43 | 0.00 | 0.00 | 0.00 | 0.00 | 0.00 | 0.00 |
| <i>Sporotomaculum</i>                | 0.00 | 0.01 | 0.00 | 0.01 | 0.00 | 0.00 | 0.01 | 0.00 | 0.12 | 0.01 | 0.25 | 0.00 |
| <i>Arthrobacter</i>                  | 0.00 | 0.02 | 0.14 | 0.00 | 0.02 | 0.17 | 0.00 | 0.02 | 0.00 | 0.00 | 0.01 | 0.01 |
| <i>Brochothrix</i>                   | 0.05 | 0.01 | 0.13 | 0.01 | 0.00 | 0.14 | 0.00 | 0.00 | 0.04 | 0.00 | 0.00 | 0.00 |
| <i>Desulfosporosinus</i>             | 0.00 | 0.01 | 0.00 | 0.00 | 0.01 | 0.02 | 0.00 | 0.01 | 0.14 | 0.00 | 0.16 | 0.01 |
| <i>Bulleidia</i>                     | 0.00 | 0.00 | 0.00 | 0.00 | 0.00 | 0.26 | 0.00 | 0.00 | 0.00 | 0.03 | 0.00 | 0.00 |
| <i>Myroides</i>                      | 0.00 | 0.01 | 0.12 | 0.00 | 0.01 | 0.12 | 0.00 | 0.00 | 0.00 | 0.00 | 0.01 | 0.00 |
| <i>Plesiocystis</i>                  | 0.00 | 0.00 | 0.01 | 0.00 | 0.00 | 0.26 | 0.00 | 0.00 | 0.00 | 0.00 | 0.00 | 0.00 |
| <i>BF311</i>                         | 0.00 | 0.00 | 0.00 | 0.00 | 0.00 | 0.00 | 0.00 | 0.00 | 0.00 | 0.01 | 0.00 | 0.25 |
| <i>Balneimonas</i>                   | 0.00 | 0.00 | 0.00 | 0.01 | 0.06 | 0.17 | 0.00 | 0.00 | 0.02 | 0.00 | 0.00 | 0.00 |
| <i>Anaerovorax</i>                   | 0.01 | 0.01 | 0.02 | 0.00 | 0.00 | 0.02 | 0.00 | 0.00 | 0.06 | 0.06 | 0.03 | 0.04 |
| <i>Streptomyces</i>                  | 0.00 | 0.00 | 0.05 | 0.00 | 0.02 | 0.14 | 0.00 | 0.00 | 0.00 | 0.00 | 0.01 | 0.03 |
| <i>Flavobacterium</i>                | 0.02 | 0.02 | 0.09 | 0.01 | 0.00 | 0.02 | 0.00 | 0.00 | 0.04 | 0.01 | 0.00 | 0.03 |
| <i>Petrobacter</i>                   | 0.00 | 0.00 | 0.00 | 0.00 | 0.00 | 0.24 | 0.00 | 0.00 | 0.00 | 0.00 | 0.00 | 0.00 |
| <i>Parabacteroides</i>               | 0.00 | 0.00 | 0.00 | 0.00 | 0.00 | 0.00 | 0.00 | 0.00 | 0.00 | 0.06 | 0.00 | 0.17 |
| <i>Mogibacterium</i>                 | 0.00 | 0.00 | 0.00 | 0.00 | 0.00 | 0.09 | 0.00 | 0.01 | 0.04 | 0.04 | 0.04 | 0.00 |
| <i>Dehalobacter_Syntrophobotulus</i> | 0.01 | 0.00 | 0.00 | 0.01 | 0.00 | 0.00 | 0.00 | 0.00 | 0.10 | 0.03 | 0.04 | 0.03 |
| <i>Desulfosarcina</i>                | 0.00 | 0.02 | 0.00 | 0.01 | 0.01 | 0.02 | 0.04 | 0.00 | 0.06 | 0.00 | 0.00 | 0.04 |
| <i>Sphingomonas</i>                  | 0.01 | 0.00 | 0.03 | 0.01 | 0.08 | 0.03 | 0.00 | 0.00 | 0.00 | 0.01 | 0.00 | 0.00 |
| <i>Nitrosopumilus</i>                | 0.01 | 0.01 | 0.00 | 0.00 | 0.01 | 0.00 | 0.01 | 0.01 | 0.00 | 0.04 | 0.06 | 0.03 |
| <i>Acidaminococcus</i>               | 0.00 | 0.00 | 0.01 | 0.00 | 0.00 | 0.02 | 0.00 | 0.00 | 0.00 | 0.14 | 0.00 | 0.00 |
| <i>Providencia</i>                   | 0.00 | 0.00 | 0.15 | 0.00 | 0.00 | 0.00 | 0.00 | 0.00 | 0.00 | 0.00 | 0.00 | 0.00 |
| <i>Stenotrophomonas</i>              | 0.00 | 0.01 | 0.02 | 0.00 | 0.01 | 0.05 | 0.00 | 0.00 | 0.02 | 0.01 | 0.03 | 0.00 |
| <i>Anaerofustis</i>                  | 0.00 | 0.00 | 0.00 | 0.00 | 0.00 | 0.02 | 0.00 | 0.00 | 0.02 | 0.01 | 0.06 | 0.04 |
| <i>Ochroactrum</i>                   | 0.00 | 0.00 | 0.07 | 0.00 | 0.02 | 0.03 | 0.00 | 0.01 | 0.00 | 0.00 | 0.00 | 0.00 |
| <i>Rummeliibacillus</i>              | 0.02 | 0.00 | 0.02 | 0.00 | 0.03 | 0.02 | 0.00 | 0.00 | 0.02 | 0.00 | 0.03 | 0.00 |
| <i>Kocuria</i>                       | 0.03 | 0.01 | 0.00 | 0.00 | 0.01 | 0.03 | 0.01 | 0.01 | 0.00 | 0.00 | 0.00 | 0.03 |
| <i>Iamia</i>                         | 0.00 | 0.00 | 0.01 | 0.00 | 0.04 | 0.09 | 0.00 | 0.00 | 0.00 | 0.00 | 0.00 | 0.00 |
| <i>Rubrivivax</i>                    | 0.01 | 0.00 | 0.02 | 0.00 | 0.00 | 0.07 | 0.02 | 0.00 | 0.00 | 0.00 | 0.00 | 0.00 |
| <i>Agromyces</i>                     | 0.00 | 0.00 | 0.00 | 0.00 | 0.00 | 0.09 | 0.00 | 0.00 | 0.02 | 0.00 | 0.00 | 0.01 |
| <i>Planctomyces</i>                  | 0.00 | 0.00 | 0.00 | 0.00 | 0.03 | 0.05 | 0.00 | 0.01 | 0.00 | 0.00 | 0.00 | 0.03 |
| <i>Lysobacter</i>                    | 0.00 | 0.01 | 0.01 | 0.00 | 0.03 | 0.05 | 0.01 | 0.01 | 0.00 | 0.00 | 0.00 | 0.00 |
| <i>Nitrospira</i>                    | 0.00 | 0.00 | 0.02 | 0.01 | 0.01 | 0.02 | 0.01 | 0.00 | 0.00 | 0.00 | 0.00 | 0.04 |
| <i>Thermomonas</i>                   | 0.02 | 0.01 | 0.01 | 0.00 | 0.01 | 0.07 | 0.00 | 0.00 | 0.00 | 0.00 | 0.00 | 0.00 |
| <i>Gracilibacter</i>                 | 0.00 | 0.00 | 0.00 | 0.00 | 0.04 | 0.00 | 0.01 | 0.02 | 0.02 | 0.00 | 0.00 | 0.01 |
| <i>Vogesella</i>                     | 0.00 | 0.00 | 0.00 | 0.00 | 0.00 | 0.10 | 0.00 | 0.00 | 0.00 | 0.00 | 0.00 | 0.00 |
| <i>Paenibacillus</i>                 | 0.01 | 0.01 | 0.02 | 0.00 | 0.01 | 0.03 | 0.00 | 0.00 | 0.00 | 0.00 | 0.01 | 0.00 |
| <i>Nannocystis</i>                   | 0.01 | 0.00 | 0.02 | 0.00 | 0.00 | 0.05 | 0.00 | 0.00 | 0.00 | 0.00 | 0.01 | 0.00 |
| <i>Anaeromyxobacter</i>              | 0.00 | 0.03 | 0.00 | 0.00 | 0.01 | 0.05 | 0.00 | 0.00 | 0.00 | 0.00 | 0.00 | 0.00 |
| <i>Sutterella</i>                    | 0.00 | 0.01 | 0.02 | 0.00 | 0.00 | 0.07 | 0.00 | 0.00 | 0.00 | 0.00 | 0.00 | 0.00 |
| <i>JG37-AG-70</i>                    | 0.01 | 0.01 | 0.01 | 0.00 | 0.03 | 0.00 | 0.00 | 0.00 | 0.04 | 0.00 | 0.00 | 0.00 |
| <i>Desulfovibrio</i>                 | 0.00 | 0.00 | 0.01 | 0.00 | 0.01 | 0.03 | 0.01 | 0.00 | 0.00 | 0.01 | 0.00 | 0.01 |
| <i>Thalassomonas</i>                 | 0.00 | 0.00 | 0.00 | 0.00 | 0.00 | 0.00 | 0.02 | 0.01 | 0.04 | 0.00 | 0.01 | 0.00 |
| <i>Candidatus Xiphinematobacter</i>  | 0.00 | 0.00 | 0.00 | 0.00 | 0.02 | 0.07 | 0.00 | 0.00 | 0.00 | 0.00 | 0.00 | 0.00 |
| <i>Aneurinibacillus</i>              | 0.00 | 0.00 | 0.00 | 0.00 | 0.00 | 0.09 | 0.00 | 0.00 | 0.00 | 0.00 | 0.00 | 0.00 |
| <i>Brevundimonas</i>                 | 0.00 | 0.00 | 0.05 | 0.00 | 0.00 | 0.02 | 0.00 | 0.00 | 0.00 | 0.00 | 0.00 | 0.01 |
| <i>Methanolobus</i>                  | 0.01 | 0.00 | 0.00 | 0.00 | 0.00 | 0.00 | 0.00 | 0.01 | 0.04 | 0.01 | 0.01 | 0.00 |
| <i>Kribbella</i>                     | 0.00 | 0.00 | 0.02 | 0.00 | 0.00 | 0.07 | 0.00 | 0.00 | 0.00 | 0.00 | 0.00 | 0.00 |
| <i>LCP-26</i>                        | 0.01 | 0.00 | 0.01 | 0.01 | 0.00 | 0.00 | 0.00 | 0.00 | 0.06 | 0.00 | 0.00 | 0.00 |
| <i>Aeromicrobium</i>                 | 0.00 | 0.00 | 0.00 | 0.00 | 0.03 | 0.05 | 0.00 | 0.00 | 0.00 | 0.00 | 0.00 | 0.00 |

|                                          |      |      |      |      |      |      |      |      |      |      |      |      |
|------------------------------------------|------|------|------|------|------|------|------|------|------|------|------|------|
| <i>Bradyrhizobium</i>                    | 0.01 | 0.00 | 0.00 | 0.00 | 0.00 | 0.05 | 0.00 | 0.00 | 0.02 | 0.00 | 0.00 | 0.00 |
| <i>Turicibacter</i>                      | 0.00 | 0.01 | 0.02 | 0.01 | 0.00 | 0.03 | 0.01 | 0.00 | 0.00 | 0.00 | 0.00 | 0.00 |
| <i>GOUTA19</i>                           | 0.00 | 0.00 | 0.01 | 0.00 | 0.00 | 0.02 | 0.00 | 0.01 | 0.00 | 0.01 | 0.00 | 0.03 |
| <i>Phenylobacterium</i>                  | 0.00 | 0.02 | 0.00 | 0.00 | 0.00 | 0.03 | 0.00 | 0.01 | 0.00 | 0.00 | 0.01 | 0.00 |
| <i>Paenochrobactrum</i>                  | 0.00 | 0.00 | 0.00 | 0.00 | 0.00 | 0.00 | 0.00 | 0.00 | 0.00 | 0.00 | 0.07 | 0.00 |
| <i>Gemmata</i>                           | 0.00 | 0.00 | 0.02 | 0.00 | 0.02 | 0.03 | 0.00 | 0.00 | 0.00 | 0.00 | 0.00 | 0.00 |
| <i>Phyllobacterium</i>                   | 0.00 | 0.00 | 0.00 | 0.00 | 0.01 | 0.03 | 0.00 | 0.01 | 0.00 | 0.00 | 0.00 | 0.01 |
| <i>Rubrobacter</i>                       | 0.00 | 0.02 | 0.01 | 0.01 | 0.00 | 0.03 | 0.00 | 0.00 | 0.00 | 0.00 | 0.00 | 0.00 |
| <i>Devosia</i>                           | 0.00 | 0.00 | 0.01 | 0.00 | 0.01 | 0.03 | 0.01 | 0.00 | 0.00 | 0.00 | 0.00 | 0.00 |
| <i>Christensenella</i>                   | 0.00 | 0.00 | 0.00 | 0.00 | 0.00 | 0.02 | 0.00 | 0.00 | 0.02 | 0.01 | 0.00 | 0.01 |
| <i>Desulfotomaculum</i>                  | 0.00 | 0.00 | 0.00 | 0.00 | 0.00 | 0.00 | 0.00 | 0.00 | 0.02 | 0.00 | 0.04 | 0.00 |
| <i>Sinorhizobium</i>                     | 0.00 | 0.00 | 0.00 | 0.00 | 0.03 | 0.03 | 0.00 | 0.00 | 0.00 | 0.00 | 0.00 | 0.00 |
| <i>Aquicella</i>                         | 0.00 | 0.00 | 0.01 | 0.00 | 0.02 | 0.03 | 0.00 | 0.00 | 0.00 | 0.00 | 0.00 | 0.00 |
| <i>Wolinella</i>                         | 0.00 | 0.02 | 0.02 | 0.00 | 0.00 | 0.02 | 0.01 | 0.00 | 0.00 | 0.00 | 0.00 | 0.00 |
| <i>Acidiphilium</i>                      | 0.01 | 0.00 | 0.02 | 0.01 | 0.00 | 0.00 | 0.00 | 0.00 | 0.00 | 0.00 | 0.01 | 0.01 |
| <i>Agrobacterium</i>                     | 0.00 | 0.00 | 0.01 | 0.00 | 0.00 | 0.02 | 0.01 | 0.00 | 0.02 | 0.00 | 0.00 | 0.00 |
| <i>Mesorhizobium</i>                     | 0.01 | 0.00 | 0.00 | 0.00 | 0.00 | 0.03 | 0.01 | 0.00 | 0.00 | 0.00 | 0.00 | 0.00 |
| <i>B-42</i>                              | 0.00 | 0.00 | 0.01 | 0.00 | 0.00 | 0.02 | 0.00 | 0.00 | 0.00 | 0.00 | 0.01 | 0.01 |
| <i>Megasphaera</i>                       | 0.00 | 0.01 | 0.01 | 0.00 | 0.02 | 0.02 | 0.00 | 0.00 | 0.00 | 0.00 | 0.00 | 0.00 |
| <i>Planococcaceae Bacillus</i>           | 0.00 | 0.00 | 0.00 | 0.00 | 0.00 | 0.05 | 0.00 | 0.00 | 0.00 | 0.00 | 0.00 | 0.00 |
| <i>Desulfitobacter</i>                   | 0.00 | 0.00 | 0.00 | 0.00 | 0.00 | 0.05 | 0.00 | 0.00 | 0.00 | 0.00 | 0.00 | 0.00 |
| <i>Paracoccus</i>                        | 0.00 | 0.00 | 0.00 | 0.01 | 0.01 | 0.03 | 0.00 | 0.00 | 0.00 | 0.00 | 0.00 | 0.00 |
| <i>Cellulosimicrobium</i>                | 0.00 | 0.00 | 0.02 | 0.00 | 0.00 | 0.03 | 0.00 | 0.00 | 0.00 | 0.00 | 0.00 | 0.00 |
| <i>Amphritea</i>                         | 0.01 | 0.00 | 0.00 | 0.00 | 0.00 | 0.00 | 0.01 | 0.00 | 0.00 | 0.00 | 0.01 | 0.01 |
| <i>Cohnella</i>                          | 0.01 | 0.00 | 0.02 | 0.00 | 0.00 | 0.02 | 0.00 | 0.00 | 0.00 | 0.00 | 0.00 | 0.00 |
| <i>Conexibacter</i>                      | 0.02 | 0.02 | 0.00 | 0.00 | 0.00 | 0.02 | 0.00 | 0.00 | 0.00 | 0.00 | 0.00 | 0.00 |
| <i>Cenarchaeum</i>                       | 0.00 | 0.00 | 0.00 | 0.01 | 0.00 | 0.02 | 0.00 | 0.00 | 0.00 | 0.00 | 0.01 | 0.00 |
| <i>Thermus</i>                           | 0.00 | 0.00 | 0.00 | 0.00 | 0.00 | 0.00 | 0.01 | 0.00 | 0.02 | 0.00 | 0.00 | 0.01 |
| <i>Tepidibacter</i>                      | 0.00 | 0.01 | 0.02 | 0.00 | 0.00 | 0.00 | 0.00 | 0.00 | 0.00 | 0.00 | 0.00 | 0.01 |
| <i>Peptostreptococcaceae Clostridium</i> | 0.01 | 0.00 | 0.00 | 0.02 | 0.00 | 0.00 | 0.00 | 0.00 | 0.00 | 0.00 | 0.01 | 0.00 |
| <i>Ureibacillus</i>                      | 0.00 | 0.00 | 0.01 | 0.00 | 0.02 | 0.02 | 0.00 | 0.00 | 0.00 | 0.00 | 0.00 | 0.00 |
| <i>Saccharomonospora</i>                 | 0.00 | 0.00 | 0.00 | 0.00 | 0.01 | 0.03 | 0.00 | 0.00 | 0.00 | 0.00 | 0.00 | 0.00 |
| <i>Afifella</i>                          | 0.00 | 0.00 | 0.01 | 0.00 | 0.01 | 0.00 | 0.01 | 0.00 | 0.00 | 0.01 | 0.00 | 0.00 |
| <i>Saccharopolyspora</i>                 | 0.01 | 0.00 | 0.00 | 0.00 | 0.00 | 0.03 | 0.00 | 0.00 | 0.00 | 0.00 | 0.00 | 0.00 |
| <i>Geobacter</i>                         | 0.01 | 0.00 | 0.00 | 0.01 | 0.00 | 0.00 | 0.01 | 0.00 | 0.00 | 0.00 | 0.00 | 0.01 |
| <i>Flaviumibacter</i>                    | 0.00 | 0.00 | 0.00 | 0.01 | 0.00 | 0.02 | 0.00 | 0.00 | 0.00 | 0.00 | 0.01 | 0.00 |
| <i>C1_B004</i>                           | 0.00 | 0.00 | 0.00 | 0.00 | 0.00 | 0.00 | 0.00 | 0.00 | 0.04 | 0.00 | 0.00 | 0.00 |
| <i>Pelobacteraceae_Pelobacter</i>        | 0.00 | 0.00 | 0.00 | 0.00 | 0.00 | 0.00 | 0.00 | 0.00 | 0.04 | 0.00 | 0.00 | 0.00 |
| <i>Desulfuromonadaceae_Pelobacter</i>    | 0.01 | 0.00 | 0.00 | 0.00 | 0.00 | 0.02 | 0.00 | 0.00 | 0.00 | 0.01 | 0.00 | 0.00 |
| <i>Rubellimicrobium</i>                  | 0.00 | 0.00 | 0.01 | 0.00 | 0.03 | 0.00 | 0.00 | 0.00 | 0.00 | 0.00 | 0.00 | 0.00 |
| <i>Mycoplana</i>                         | 0.00 | 0.00 | 0.00 | 0.00 | 0.00 | 0.02 | 0.00 | 0.00 | 0.02 | 0.00 | 0.00 | 0.00 |
| <i>Shimazuella</i>                       | 0.00 | 0.00 | 0.00 | 0.00 | 0.00 | 0.02 | 0.00 | 0.00 | 0.02 | 0.00 | 0.00 | 0.00 |
| <i>Anaerofilum</i>                       | 0.00 | 0.00 | 0.01 | 0.00 | 0.00 | 0.00 | 0.00 | 0.00 | 0.00 | 0.00 | 0.00 | 0.03 |
| <i>Desulfobacca</i>                      | 0.00 | 0.01 | 0.00 | 0.00 | 0.00 | 0.00 | 0.00 | 0.00 | 0.00 | 0.01 | 0.00 | 0.01 |
| <i>Brevibacillus</i>                     | 0.00 | 0.00 | 0.00 | 0.00 | 0.00 | 0.03 | 0.00 | 0.00 | 0.00 | 0.00 | 0.00 | 0.00 |
| <i>Cupriavidus</i>                       | 0.00 | 0.00 | 0.00 | 0.00 | 0.00 | 0.03 | 0.00 | 0.00 | 0.00 | 0.00 | 0.00 | 0.00 |
| <i>Haliangium</i>                        | 0.00 | 0.00 | 0.00 | 0.00 | 0.00 | 0.03 | 0.00 | 0.00 | 0.00 | 0.00 | 0.00 | 0.00 |
| <i>Leucobacter</i>                       | 0.00 | 0.00 | 0.00 | 0.00 | 0.00 | 0.03 | 0.00 | 0.00 | 0.00 | 0.00 | 0.00 | 0.00 |
| <i>Veillonella</i>                       | 0.00 | 0.00 | 0.00 | 0.00 | 0.00 | 0.03 | 0.00 | 0.00 | 0.00 | 0.00 | 0.00 | 0.00 |
| <i>BD2-6</i>                             | 0.00 | 0.00 | 0.00 | 0.01 | 0.01 | 0.02 | 0.00 | 0.00 | 0.00 | 0.00 | 0.00 | 0.00 |
| <i>Dechloromonas</i>                     | 0.00 | 0.02 | 0.01 | 0.00 | 0.01 | 0.00 | 0.00 | 0.00 | 0.00 | 0.00 | 0.00 | 0.00 |
| <i>Propionibacterium</i>                 | 0.00 | 0.00 | 0.02 | 0.00 | 0.00 | 0.02 | 0.00 | 0.00 | 0.00 | 0.00 | 0.00 | 0.00 |
| <i>Rhodovibrio</i>                       | 0.00 | 0.02 | 0.00 | 0.00 | 0.00 | 0.02 | 0.00 | 0.00 | 0.00 | 0.00 | 0.00 | 0.00 |
| <i>Sphingopyxis</i>                      | 0.01 | 0.00 | 0.01 | 0.00 | 0.00 | 0.02 | 0.00 | 0.00 | 0.00 | 0.00 | 0.00 | 0.00 |
| <i>Dethiobacter</i>                      | 0.00 | 0.00 | 0.00 | 0.00 | 0.00 | 0.00 | 0.01 | 0.00 | 0.02 | 0.00 | 0.00 | 0.00 |
| <i>Hydrogenophilaceae_Thiobacillus</i>   | 0.00 | 0.00 | 0.02 | 0.01 | 0.00 | 0.00 | 0.00 | 0.00 | 0.00 | 0.00 | 0.00 | 0.00 |
| <i>Halomonas</i>                         | 0.00 | 0.02 | 0.00 | 0.00 | 0.00 | 0.00 | 0.00 | 0.00 | 0.00 | 0.00 | 0.01 | 0.00 |
| <i>Photobacterium</i>                    | 0.00 | 0.00 | 0.00 | 0.00 | 0.00 | 0.02 | 0.01 | 0.00 | 0.00 | 0.00 | 0.00 | 0.00 |
| <i>Ruminococcaceae Clostridium</i>       | 0.00 | 0.00 | 0.00 | 0.00 | 0.00 | 0.00 | 0.00 | 0.00 | 0.00 | 0.00 | 0.00 | 0.03 |
| <i>Desulfobacter</i>                     | 0.00 | 0.00 | 0.00 | 0.00 | 0.00 | 0.02 | 0.00 | 0.01 | 0.00 | 0.00 | 0.00 | 0.00 |
| <i>Reinekea</i>                          | 0.00 | 0.00 | 0.00 | 0.01 | 0.00 | 0.00 | 0.00 | 0.00 | 0.02 | 0.00 | 0.00 | 0.00 |
| <i>Actinomadura</i>                      | 0.00 | 0.00 | 0.00 | 0.00 | 0.01 | 0.02 | 0.00 | 0.00 | 0.00 | 0.00 | 0.00 | 0.00 |
| <i>Sorangium</i>                         | 0.00 | 0.00 | 0.00 | 0.00 | 0.01 | 0.02 | 0.00 | 0.00 | 0.00 | 0.00 | 0.00 | 0.00 |
| <i>Geosporobacter_Thermotalea</i>        | 0.00 | 0.00 | 0.00 | 0.00 | 0.00 | 0.00 | 0.01 | 0.00 | 0.00 | 0.00 | 0.00 | 0.01 |
| <i>Nocardia</i>                          | 0.00 | 0.00 | 0.01 | 0.00 | 0.00 | 0.02 | 0.00 | 0.00 | 0.00 | 0.00 | 0.00 | 0.00 |
| <i>Skermanella</i>                       | 0.00 | 0.00 | 0.01 | 0.00 | 0.00 | 0.02 | 0.00 | 0.00 | 0.00 | 0.00 | 0.00 | 0.00 |

|                                                                                                       |              |              |              |              |              |              |              |              |              |              |              |              |
|-------------------------------------------------------------------------------------------------------|--------------|--------------|--------------|--------------|--------------|--------------|--------------|--------------|--------------|--------------|--------------|--------------|
| <i>Luteimonas</i>                                                                                     | 0.00         | 0.01         | 0.00         | 0.00         | 0.00         | 0.02         | 0.00         | 0.00         | 0.00         | 0.00         | 0.00         | 0.00         |
| <i>Alcanivorax</i>                                                                                    | 0.00         | 0.01         | 0.00         | 0.01         | 0.01         | 0.00         | 0.00         | 0.00         | 0.00         | 0.00         | 0.00         | 0.00         |
| <i>Prauserella</i>                                                                                    | 0.00         | 0.00         | 0.00         | 0.00         | 0.00         | 0.00         | 0.00         | 0.01         | 0.00         | 0.00         | 0.01         | 0.00         |
| <i>Geovibrio</i>                                                                                      | 0.00         | 0.00         | 0.00         | 0.01         | 0.00         | 0.02         | 0.00         | 0.00         | 0.00         | 0.00         | 0.00         | 0.00         |
| <i>Ectothiorhodospiraceae Thiobacillus</i>                                                            | 0.00         | 0.00         | 0.00         | 0.00         | 0.00         | 0.00         | 0.02         | 0.00         | 0.00         | 0.00         | 0.00         | 0.00         |
| <i>Cellvibrio</i>                                                                                     | 0.00         | 0.00         | 0.02         | 0.00         | 0.00         | 0.00         | 0.00         | 0.00         | 0.00         | 0.00         | 0.00         | 0.00         |
| <i>Hyphomonas</i>                                                                                     | 0.00         | 0.00         | 0.02         | 0.00         | 0.00         | 0.00         | 0.00         | 0.00         | 0.00         | 0.00         | 0.00         | 0.00         |
| <i>Wautersiella</i>                                                                                   | 0.00         | 0.00         | 0.02         | 0.00         | 0.00         | 0.00         | 0.00         | 0.00         | 0.00         | 0.00         | 0.00         | 0.00         |
| <i>Laceyella</i>                                                                                      | 0.00         | 0.02         | 0.01         | 0.00         | 0.00         | 0.00         | 0.00         | 0.00         | 0.00         | 0.00         | 0.00         | 0.00         |
| <i>Microbulbifer</i>                                                                                  | 0.00         | 0.00         | 0.00         | 0.00         | 0.00         | 0.00         | 0.00         | 0.01         | 0.00         | 0.01         | 0.00         | 0.00         |
| <i>Fulvivirga</i>                                                                                     | 0.00         | 0.00         | 0.00         | 0.00         | 0.00         | 0.00         | 0.01         | 0.01         | 0.00         | 0.00         | 0.00         | 0.00         |
| <i>Leptospirillum</i>                                                                                 | 0.00         | 0.01         | 0.00         | 0.00         | 0.00         | 0.00         | 0.00         | 0.00         | 0.00         | 0.00         | 0.00         | 0.01         |
| <i>Psychromonas</i>                                                                                   | 0.00         | 0.01         | 0.00         | 0.00         | 0.00         | 0.00         | 0.00         | 0.00         | 0.00         | 0.00         | 0.00         | 0.01         |
| <i>Macrococcus</i>                                                                                    | 0.00         | 0.00         | 0.00         | 0.01         | 0.00         | 0.00         | 0.00         | 0.00         | 0.00         | 0.00         | 0.00         | 0.01         |
| <i>Syntrophobacter</i>                                                                                | 0.00         | 0.00         | 0.01         | 0.00         | 0.00         | 0.00         | 0.00         | 0.00         | 0.00         | 0.01         | 0.00         | 0.00         |
| <i>Myxococcus</i>                                                                                     | 0.00         | 0.01         | 0.00         | 0.00         | 0.00         | 0.00         | 0.00         | 0.00         | 0.00         | 0.01         | 0.00         | 0.00         |
| <i>Peptostreptococcus</i>                                                                             | 0.00         | 0.01         | 0.00         | 0.00         | 0.00         | 0.00         | 0.01         | 0.00         | 0.00         | 0.00         | 0.00         | 0.00         |
| <i>Lachnospiraceae Clostridium</i>                                                                    | 0.00         | 0.01         | 0.00         | 0.00         | 0.00         | 0.00         | 0.00         | 0.01         | 0.00         | 0.00         | 0.00         | 0.00         |
| <i>Halothiobacillus</i>                                                                               | 0.01         | 0.00         | 0.00         | 0.00         | 0.01         | 0.00         | 0.00         | 0.00         | 0.00         | 0.00         | 0.00         | 0.00         |
| <i>Nonomuraea</i>                                                                                     | 0.01         | 0.00         | 0.00         | 0.00         | 0.01         | 0.00         | 0.00         | 0.00         | 0.00         | 0.00         | 0.00         | 0.00         |
| <i>Peptoniphilus</i>                                                                                  | 0.01         | 0.00         | 0.00         | 0.00         | 0.01         | 0.00         | 0.00         | 0.00         | 0.00         | 0.00         | 0.00         | 0.00         |
| <i>Oceanospirillum</i>                                                                                | 0.00         | 0.00         | 0.00         | 0.01         | 0.01         | 0.00         | 0.00         | 0.00         | 0.00         | 0.00         | 0.00         | 0.00         |
| <i>Achromobacter</i>                                                                                  | 0.00         | 0.00         | 0.02         | 0.00         | 0.00         | 0.00         | 0.00         | 0.00         | 0.00         | 0.00         | 0.00         | 0.00         |
| <i>DA101</i>                                                                                          | 0.00         | 0.00         | 0.02         | 0.00         | 0.00         | 0.00         | 0.00         | 0.00         | 0.00         | 0.00         | 0.00         | 0.00         |
| <i>Pandoraea</i>                                                                                      | 0.00         | 0.00         | 0.02         | 0.00         | 0.00         | 0.00         | 0.00         | 0.00         | 0.00         | 0.00         | 0.00         | 0.00         |
| <i>Pirellula</i>                                                                                      | 0.00         | 0.00         | 0.02         | 0.00         | 0.00         | 0.00         | 0.00         | 0.00         | 0.00         | 0.00         | 0.00         | 0.00         |
| <i>Lutimonas</i>                                                                                      | 0.02         | 0.00         | 0.00         | 0.00         | 0.00         | 0.00         | 0.00         | 0.00         | 0.00         | 0.00         | 0.00         | 0.00         |
| <i>Symbiobacterium</i>                                                                                | 0.02         | 0.00         | 0.00         | 0.00         | 0.00         | 0.00         | 0.00         | 0.00         | 0.00         | 0.00         | 0.00         | 0.00         |
| <i>Lutibacter</i>                                                                                     | 0.00         | 0.00         | 0.00         | 0.00         | 0.00         | 0.00         | 0.00         | 0.00         | 0.00         | 0.00         | 0.01         | 0.00         |
| <i>Flavisolibacter</i>                                                                                | 0.00         | 0.00         | 0.00         | 0.00         | 0.00         | 0.00         | 0.00         | 0.00         | 0.00         | 0.00         | 0.00         | 0.01         |
| <i>Virgibacillus</i>                                                                                  | 0.00         | 0.00         | 0.00         | 0.00         | 0.00         | 0.00         | 0.00         | 0.00         | 0.00         | 0.01         | 0.00         | 0.00         |
| <i>Shewanella</i>                                                                                     | 0.00         | 0.00         | 0.00         | 0.00         | 0.00         | 0.00         | 0.01         | 0.00         | 0.00         | 0.00         | 0.00         | 0.00         |
| <i>Butyrivibrio</i>                                                                                   | 0.00         | 0.01         | 0.00         | 0.00         | 0.00         | 0.00         | 0.00         | 0.00         | 0.00         | 0.00         | 0.00         | 0.00         |
| <i>Chryseobacterium</i>                                                                               | 0.01         | 0.00         | 0.00         | 0.00         | 0.00         | 0.00         | 0.00         | 0.00         | 0.00         | 0.00         | 0.00         | 0.00         |
| <i>Opitutus</i>                                                                                       | 0.01         | 0.00         | 0.00         | 0.00         | 0.00         | 0.00         | 0.00         | 0.00         | 0.00         | 0.00         | 0.00         | 0.00         |
| <i>Gordonia</i>                                                                                       | 0.00         | 0.00         | 0.00         | 0.01         | 0.00         | 0.00         | 0.00         | 0.00         | 0.00         | 0.00         | 0.00         | 0.00         |
| <b>Abundance of total shared genera (%<br/>of all classified genera/sequences) in<br/>each sample</b> | <b>98.62</b> | <b>98.55</b> | <b>93.66</b> | <b>98.86</b> | <b>94.33</b> | <b>77.17</b> | <b>98.39</b> | <b>92.85</b> | <b>81.47</b> | <b>97.67</b> | <b>90.96</b> | <b>93.70</b> |
| <b>Abundance of total classified<br/>genera/sequences (% of total good<br/>quality sequences)</b>     | <b>91.31</b> | <b>90.39</b> | <b>89.48</b> | <b>92.71</b> | <b>75.72</b> | <b>43.21</b> | <b>58.45</b> | <b>69.70</b> | <b>36.97</b> | <b>54.72</b> | <b>49.21</b> | <b>52.24</b> |

**Table S5**

Relative abundances (% of total good quality sequences) of dominant phyla and distinct classes in different type of FPMs.

| Dominant phylum/Distinct class      | Types of FPMs*          |                          |                           |
|-------------------------------------|-------------------------|--------------------------|---------------------------|
|                                     | Degraded                | Normal                   | High-quality              |
| Firmicutes                          | 91.29±2.98 <sup>a</sup> | 52.31±28.55 <sup>b</sup> | 31.16±8.28 <sup>b</sup>   |
| Bacilli                             | 85.42±3.09 <sup>a</sup> | 6.02±2.78 <sup>b</sup>   | 3.79±0.8 <sup>b</sup>     |
| Clostridia                          | 5.33±1.05 <sup>a</sup>  | 44.84±27.18 <sup>b</sup> | 26.08±7.26 <sup>ab</sup>  |
| Cloacamonae                         | 0.08±0.02 <sup>a</sup>  | 0.3±0.44 <sup>a</sup>    | 5.27±1.58 <sup>b</sup>    |
| Bacteroidetes                       | 1.14±0.2 <sup>a</sup>   | 3.64±3.77 <sup>a</sup>   | 27.51±1.48 <sup>b</sup>   |
| Bacteroidia                         | 0.93±0.12 <sup>a</sup>  | 3.56±3.77 <sup>a</sup>   | 27.44±1.49 <sup>b</sup>   |
| Euryarchaeota                       | 1.02±0.22 <sup>a</sup>  | 29.15±22.51 <sup>b</sup> | 27.57±10.19 <sup>b</sup>  |
| Methanobacteria                     | 0.76±0.16 <sup>a</sup>  | 25.6±18.57 <sup>b</sup>  | 15.28±10.63 <sup>ab</sup> |
| Total abundance of dominant phyla   | 93.45                   | 85.1                     | 86.24                     |
| Total abundance of distinct classes | 92.5                    | 80.32                    | 77.86                     |

\*Values with different letters in a row mean significant difference (p<0.05).

**Table S6**

Pearson's correlation coefficients between environmental measurable variables and dominant prokaryotic phyla (>10%) and distinct genera.

| Phylum/Class           | DOC     | pH      | Moisture | Lactate | TN     | NH <sub>4</sub> <sup>+</sup> | AP      | N[ <i>Clostridia</i> ] <sup>a</sup> | N[ <i>C.kluyveri</i> ] | N[LAB] |
|------------------------|---------|---------|----------|---------|--------|------------------------------|---------|-------------------------------------|------------------------|--------|
| <i>Firmicutes</i>      | .764**  | -.805** | 0.522    | .763**  | -0.149 | -.803**                      | -.857** | -.649*                              | -.653*                 | .756** |
| <i>Bacilli</i>         | .909**  | -.857** | .589*    | .971**  | -0.002 | -.962**                      | -.974** | -.911**                             | -.810**                | .920** |
| <i>Clostridia</i>      | -0.56   | 0.417   | -0.336   | -.671*  | -0.189 | .600*                        | 0.551   | .713**                              | 0.531                  | -.592* |
| <i>Cloacamonae</i>     | -.676*  | .747**  | -0.182   | -0.536  | 0.207  | .613*                        | 0.566   | 0.553                               | .592*                  | -0.553 |
| <i>Bacteroidetes</i>   | -.751** | .833**  | -0.408   | -.592*  | 0.216  | .634*                        | .628*   | 0.555                               | 0.524                  | -.681* |
| <i>Bacteroidia</i>     | -.753** | .835**  | -0.408   | -.596*  | 0.213  | .639*                        | .631*   | 0.56                                | 0.529                  | -.685* |
| <i>Euryarchaeota</i>   | -0.576  | 0.546   | -0.321   | -.657*  | 0.148  | .759**                       | .804**  | .601*                               | .632*                  | -.598* |
| <i>Methanobacteria</i> | -0.339  | 0.295   | -0.134   | -0.548  | -0.102 | .654*                        | .684*   | 0.523                               | .580*                  | -0.423 |

\*\* Correlation is significant at p<0.01. \* Significant at p<0.05.

<sup>a</sup> N[*Clostridia*], N[*C. kluyveri*] and N[LAB] respectively represent the absolute abundances (Log10 16S rRNA gene copies / g FPM) of *Clostridia*, *C. kluyveri* and LAB in FPM samples.

**Table S7**

Relative abundances (% of total classified sequences that can be identified into known genera) of core genera (in bold blue font) in different type of FPMs.

| Domain                                | Class               | Core genus                | Types of FPMs           |              |              |
|---------------------------------------|---------------------|---------------------------|-------------------------|--------------|--------------|
|                                       |                     |                           | Degraded                | Normal       | High-quality |
| Bacteria                              | <i>Anaerolineae</i> | <i>T78</i>                | 0.02                    | 0.86         | <b>1.26</b>  |
|                                       | <i>Bacilli</i>      | <i>Lactobacillus</i>      | <b>91.46</b>            | <b>7.05</b>  | <b>6.45</b>  |
|                                       | <i>Bacteroidia</i>  | <i>Blvii28</i>            | 0.02                    | 0.28         | <b>1.48</b>  |
|                                       | <i>Bacteroidia</i>  | <i>Prevotella</i>         | 0.08                    | 0.17         | <b>2.58</b>  |
|                                       | <i>Clostridia</i>   | <i>Caloramator</i>        | 0.31                    | <b>7.35</b>  | <b>2.74</b>  |
|                                       | <i>Clostridia</i>   | <i>Clostridium</i>        | 0.73                    | <b>1.74</b>  | <b>2.23</b>  |
|                                       | <i>Clostridia</i>   | <i>Pelotomaculum</i>      | 0.01                    | 0.03         | <b>1.11</b>  |
|                                       | <i>Clostridia</i>   | <i>Ruminococcus</i>       | <b>1.71</b>             | <b>41.51</b> | <b>9.97</b>  |
|                                       | <i>Clostridia</i>   | <i>Sedimentibacter</i>    | 0.41                    | <b>1.47</b>  | <b>4.00</b>  |
|                                       | <i>Clostridia</i>   | <i>Sporanaerobacter</i>   | 0.15                    | <b>1.44</b>  | 0.94         |
|                                       | <i>Clostridia</i>   | <i>Syntrophomonas</i>     | 0.16                    | <b>1.04</b>  | <b>6.73</b>  |
|                                       | Archaea             | <i>Methanobacteria</i>    | <i>Methanobacterium</i> | 0.30         | <b>7.04</b>  |
| <i>Methanobacteria</i>                |                     | <i>Methanobrevibacter</i> | 0.39                    | <b>13.61</b> | <b>25.68</b> |
| <i>Methanomicrobia</i>                |                     | <i>Methanoculleus</i>     | 0.05                    | <b>1.04</b>  | <b>1.24</b>  |
| <i>Methanomicrobia</i>                |                     | <i>Methanosaeta</i>       | 0.01                    | 0.35         | <b>2.55</b>  |
| <i>Methanomicrobia</i>                |                     | <i>Methanosarcina</i>     | 0.19                    | <b>2.54</b>  | <b>19.89</b> |
| <i>Thaumarchaeota</i>                 |                     | <i>Nitrososphaera</i>     | 0.06                    | <b>2.43</b>  | 0.06         |
| <b>Total number of core genera</b>    |                     |                           | <b>2</b>                | <b>12</b>    | <b>15</b>    |
| <b>Total abundance of core genera</b> |                     |                           | <b>96.06</b>            | <b>89.96</b> | <b>91.28</b> |



## Reference

1. **Zhang J, Fang F, Chen J, Du G.** 2014. The arginine deiminase pathway of koji bacteria is involved in ethyl carbamate precursor production in soy sauce. *FEMS Microbiol. Lett.* **358**:91-97.
2. **Wang HY, Zhang XJ, Zhao LP, Xu Y.** 2008. Analysis and comparison of the bacterial community in fermented grains during the fermentation for two different styles of Chinese liquor. *J. Ind. Microbiol. Biot.* **35**:603-609.
3. **Kim J, Lim J, Lee C.** 2013. Quantitative real-time PCR approaches for microbial community studies in wastewater treatment systems: applications and considerations. *Biotechnol. Adv.* **31**:1358-1373.
4. **Hu XL, Wang HY, Wu Q, Xu Y.** 2014. Development, validation and application of specific primers for analyzing the clostridial diversity in dark fermentation pit mud by PCR-DGGE. *Bioresource Technol.* **163**:40-47.
5. **Weimer PJ, Stevenson DM.** 2012. Isolation, characterization, and quantification of *Clostridium kluyveri* from the bovine rumen. *Appl. Microbiol. Biotechnol.* **94**:461-466.
6. **Walter J, Hertel C, Tannock GW, Lis CM, Munro K, Hammes WP.** 2001. Detection of *Lactobacillus*, *Pediococcus*, *Leuconostoc*, and *Weissella* species in human feces by using group-specific PCR primers and denaturing gradient gel electrophoresis. *Appl. Environ. Microb.* **67**:2578-2585.
7. **Rodríguez A, Isabel Luque M, Andrade MJ, Rodríguez M, Asensio MA, Córdoba JJ.** 2011. Development of real-time PCR methods to quantify patulin-producing molds in food products. *Food Microbiol* **28**:1190-1199.
8. **Martinez-Blanch JF, Sanchez G, Garay E, Aznar R.** 2009. Development of a real-time PCR assay for detection and quantification of enterotoxigenic members of *Bacillus cereus* group in food samples. *Int. J. Food Microbiol.* **135**:15-21.
